# Supplementary material for: Self-sensitized Cu(ii)-complex catalyzed solar driven CO2 reduction
Source: Royal Society of Chemistry journal article supplement (doi:10.1039/d4sc06354f), 2025-01-01
Supplement: d4sc06354f1.pdf [file d4sc06354f1.pdf]

## Supporting Information

### **Self-sensitized Cu(II)-Complex Catalyzed Solar Driven CO<sub>2</sub> Reduction**

Soumadip Das, Aritra Roy, Navonil Chakrabarti, Narottam Mukhopadhyay, Aniruddha Sarkar and Sayam Sen Gupta\*

Department of Chemical Sciences, Indian Institute of Science Education and Research Kolkata, Mohanpur, 741246, India

\*Email: [sayam.sengupta@iiserkol.ac.in](mailto:sayam.sengupta@iiserkol.ac.in)

## Contents:

| <b>Figures</b> | <b>Figure Description</b>                                                                               | <b>Pages</b> |
|----------------|---------------------------------------------------------------------------------------------------------|--------------|
| Figure S1 – 13 | <sup>1</sup> H and <sup>13</sup> C NMR of compounds and HRMS, ESI-MS, and HPLC spectra of the compounds | S9-14        |
| Figure S14     | UV-vis spectra of Complex <b>3</b>                                                                      | S15          |
| Figure S15     | SC-XRD structure for [K <sup>+</sup> (18-crown-6)][Cu(NDPA)] ( <b>1</b> )                               | S16          |
| Figure S16     | SC-XRD structure for [Cu(NDPA)Cl] ( <b>3</b> )                                                          | S19          |
| Figure S17-20  | HR-MS and Absorption spectral changes supporting the Coordination switch of Complex <b>1</b>            | S22-23       |
| Figure S21-23  | Molar absorption coefficients of Complex <b>1</b>                                                       | S23-24       |
| Figure S24     | Cyclic Voltammogram of Complex <b>1</b>                                                                 | S25          |
| Figure S25     | Cyclic Voltammogram of Complex <b>H<sub>3</sub>L</b>                                                    | S25          |
| Figure S26     | X-band EPR spectra of Complex <b>1</b>                                                                  | S26          |
| Figure S27     | X-band EPR spectra of Complex <b>2</b>                                                                  | S26          |
| Figure S28     | Normalized Emission spectra of <b>H<sub>3</sub>L</b>                                                    | S27          |
| Figure S29     | Normalized Emission spectra of <b>1</b> for 575nm excitation                                            | S27          |
| Figure S30     | Emission spectra of <b>1</b> at different excitation wavelengths                                        | S28          |
| Figure S31     | Absorption spectral change of <b>1</b> after CPE at -1.25 (Fc <sup>+</sup> /Fc)                         | S28          |
| Figure S32     | Absorption spectral change of <b>1</b> after CPE at -1.5 (Fc <sup>+</sup> /Fc)                          | S29          |
| Figure S33-35  | Cyclic voltammogram and spectroelectrochemistry data of <b>1</b> at reaction condition                  | S29-S30      |
| Figure S36     | Photocatalytic CO <sub>2</sub> reduction at different H <sub>2</sub> O concentrations                   | S31          |
| Figure S37     | DLS of reaction mixture before and after photocatalytic CO <sub>2</sub> reduction                       | S32          |
| Figure S38     | k <sub>H</sub> /k <sub>D</sub> plot                                                                     | S32          |
| Figure S39     | UV-vis spectra of reaction mixture before and after photocatalytic CO <sub>2</sub> reduction            | S33          |
| Figure S40-41  | Photobleaching control experiments                                                                      | S33-S34      |
| Figure S42     | Cyclic Voltammetry of <b>1</b> upon CO <sub>2</sub> saturation                                          | S34          |
| Figure S43     | Infrared (IR) Spectrum of Cu(II)-COOH species                                                           | S35          |
| Figure S44     | UV-vis spectrum of Complex <b>4</b> synthesized by different processes                                  | S35          |
| Figure S45     | Absorption spectral change of <b>4</b> upon areal reoxidation                                           | S36          |
| Figure S46     | Gas Chromatography/ Mass Spectrometry (GC/MS) showing the mass (m/z) of CO evolved                      | S36          |
| Figure S47     | <sup>1</sup> H NMR analysis of liquid phase product                                                     | S37          |
| Figure S48     | DFT optimized structure of <b>1</b>                                                                     | S37          |
| Figure S49     | Spin density plot for <b>1</b>                                                                          | S38          |
| Figure S50-52  | TD-DFT analysis of electronic transitions of <b>1</b>                                                   | S38-39       |

| <b>Schemes</b> | <b>Scheme Description</b>                                                                                                                                   | <b>Pages</b> |
|----------------|-------------------------------------------------------------------------------------------------------------------------------------------------------------|--------------|
| Scheme S1      | Synthetic scheme for the NDPA(H <sub>3</sub> L) ligand                                                                                                      | S8           |
| Scheme S2      | Synthetic scheme for <b>1</b>                                                                                                                               | S8           |
| Scheme S3      | Synthetic scheme for <b>3</b>                                                                                                                               | S9           |
| <b>Tables</b>  | <b>Table Description</b>                                                                                                                                    | <b>Pages</b> |
| Table S1-4     | Crystal Data and Structural Refinement for <b>1</b>                                                                                                         | S16-18       |
| Table S5-8     | Crystal Data and Structural Refinement for <b>3</b>                                                                                                         | S19-21       |
| Table S9-12    | Photocatalytic reduction of CO <sub>2</sub> at variable conditions                                                                                          | S30-31       |
| Table S13      | TCSPC lifetime fit parameters                                                                                                                               | S34          |
| Table S14      | Comparison of activity with the previously reported first-row transition metal complexes-based function integrated photocatalytic CO <sub>2</sub> reduction | S37          |
| Table S15      | Bond distance comparison between SCXRD and DFT optimized structure                                                                                          | S38          |

| <b>Experimental Section</b> | <b>Pages</b> |
|-----------------------------|--------------|
| Materials and Methods       | S3           |
| Instrumentation             | S3           |

|                                          |      |
|------------------------------------------|------|
| Quantum Chemistry Calculations           | S3   |
| Crystal Structure Determination          | S3   |
| Electrochemical Measurements             | S4   |
| Fluorescence Quenching                   | S4   |
| Photocatalytic CO <sub>2</sub> reduction | S4   |
| General Synthetic Procedures             | S4-6 |

## EXPERIMENTAL SECTION

### 1. Materials and Methods:

All materials were commercially purchased and used without further purification unless otherwise mentioned. Pyrrole-2-carboxylic acid, HATU, and p-nitrobenzaldehyde were purchased from BLDpharma. N, N-diisopropylethylamine, and Pivaloyl Chloride were purchased from Spectrochem. 4-isopropylaniline, 18-crown-6, was purchased from TCI Chemicals. Pd/C, DDQ, and anhydrous CuCl<sub>2</sub>, KH were purchased from Sigma Aldrich. THF, Acetonitrile, N, N-dimethylformamide, Hexane, Diethyl Ether, and Toluene were purchased from Merck and used after distillation over corresponding drying agents<sup>1</sup>. For metalation, double-distilled, sodium-dried THF was used. For manipulation of the metal complex, acetonitrile was double-distilled and used. For thin-layer chromatography (TLC) analysis, Merck precoated TLC plates (silica gel 60 F254/0.25 mm) were used.

### 2. Instrumentation:

UV-vis spectral studies were carried out using an Agilent diode array Cary 8454 spectrophotometer (190–1100 nm range). Room temperature solution state emissions were performed with a Fluoromax3 spectrofluorometer from Horiba Jobin Yvon. The TCSPC measurements were recorded using a Horiba DeltaFlex-01 TCSPC spectrometer ( $\lambda_{\text{ex}} = 405 \text{ nm}$ ). The instrument response function (IRF) of the instrument used for fluorescence lifetime measurement is 100ps. DLS measurements were carried out using Malvern Zetasizer NanoZS. Mass spectral analyses were done in a Bruker micrOTOF-Q II spectrometer and Waters-HAB213 spectrometer. <sup>1</sup>H and <sup>13</sup>C NMR spectra were collected using Bruker (<sup>1</sup>H: 500 MHz, <sup>13</sup>C: 126 MHz) referenced to the resonances of the solvent used. Glassy Carbon, Pt, and Ag/AgCl (aqueous) electrodes were purchased from CH Instruments. All the cyclic voltammetry studies were carried out in CHI-660 potentiostat. Electron Paramagnetic Resonance (EPR) spectroscopy was studied by a Bruker spectrometer (Bruker, EMXmicro) operating at X-band frequency (Microwave frequency 9.32 GHz) and magnetic field modulation of 100 kHz, with a microwave power of 48.83 mW and modulation amplitude of 10 G at low temperatures. The EPR spectra were calibrated with diphenylpicrylhydrazyl, DPPH ( $g = 2.0037$ ). Parameters at which this EPR was recorded are as follows-  $\nu_{\text{MW}} = 9.31 \text{ GHz}$  (3.2 mW), 10 G field modulation (100 kHz), receiver gain =  $2 \times 10^2$ , time constant = 81.92 ms, conversion time = 150ms (80 K). Spectra were treated using Bruker WinEPR software and simulated using Bruker SIMFONIA software. Kessil lamp (model: PR160L-390 nm) and (model: PR160L-427 nm) were used for photo-irradiation on the reaction mixture. Gas Chromatography (GC) was performed on a Thermo Scientific Carbon plot gas chromatograph using a DB-5 ms capillary column (30 m  $\times$  0.25 mm  $\times$  0.25  $\mu\text{m}$ , J&W Scientific) with helium as the carrier gas. FTIR Perkin-Elmer spectrophotometer was used to obtain the FT-IR spectra.

### 2. Quantum Chemistry Calculation:

The DFT optimization was performed using Gaussian 16.<sup>2</sup> The geometry optimizations, molecular orbital, and TDDFT calculation of the ground state structures were carried out using unrestricted B3LYP as a function.<sup>3,4</sup> Geometries were optimized without constraints and confirmed as local minima through a frequency analysis with the basic set LANL2DZ for copper and 6-311G+\* on the rest of the atoms.<sup>5,6</sup> All calculations were run with a solvent model (SMD) with a dielectric constant mimicking acetonitrile. Molecular orbital optimization and TDDFT calculation were performed with basis set LANL2DZ for copper and 6-311G+\* on the rest of the atoms.

### 3. Crystal Structure Determination:

Single crystals of suitable dimension were used for data collection. Diffraction intensities were collected on a XtaLAB Synergy, Dualflex, HyPix3000, four-circle diffractometer (Department of Chemical Sciences, IISER Kolkata, India), with graphite monochromated Cu-K $\alpha$  radiation ( $\lambda = 1.54184 \text{ \AA}$ ) at 100(2) K for **2–4**. The data were corrected for absorption. For data reduction, the 'Bruker SAINT PLUS' and 'CrysAlisPro 1.171.41.93a' programs were used. Data were corrected for Lorentz and polarization effects; empirical absorption corrections (SADABS v 2.10) were applied. The structures were solved by SHELXT and refined with the SHELXL–2016 package,<sup>7</sup> incorporated into the Olex2 1.2.8–alpha crystallographic collective package.<sup>8,9</sup> All crystal structures are represented by the MERCURY program.<sup>10</sup> The positions of the hydrogen atoms were calculated by assuming ideal geometries but not refined. All non-hydrogen atoms were refined with anisotropic thermal parameters by full-matrix least-squares procedures on  $F^2$ . Pertinent crystallographic parameters are summarized in **Table S1** (for **1** at 100(2) K).

#### 4. Electrochemical Measurement (Homogeneous):

Cyclic voltammetry experiments were performed to investigate the redox potential of the ligand and the complex. Glassy carbon was used as a working electrode, an Ag/AgCl (saturated KCl, aq.) was used as a reference, and a Pt wire was used as a counter electrode. All electrochemical measurements were performed in acetonitrile, and tetrabutylammonium hexafluorophosphate (TBAPF<sub>6</sub>) was used as a supporting electrolyte. The electrolytic solution was saturated with Ar or CO<sub>2</sub>, as mentioned. Ferrocenium/Ferrocene (Fc<sup>+</sup>/Fc) couple was used as an internal standard against which all data has been standardized.

#### 5. Fluorescence Quenching:

In a sealed quartz cuvette with a septum cover, a solution of **1** was taken in Ar-degassed acetonitrile. The solution received additions of varying concentrations of Et<sub>3</sub>N. The steady-state fluorescence was measured using a Horiba Fluoromax 4 spectrofluorometer. The excited state lifetime ( $\tau_0$ ) of **1** was measured with a nanosecond pulse diode laser ( $\lambda=405\text{nm}$ ) was used as the excitation source. The quenching rate constant ( $k_q$ ) was calculated by the Stern-Volmer equation:

$$\frac{I_0}{I} = 1 + k_q \times \tau_0 \times [Q]$$

Where,  $I_0$  and  $I$  represent the fluorescence intensity of photosensitizer in the absence and presence of a quencher,  $k_q$  is the quenching rate constant, and  $[Q]$  is the concentration of the quencher.

#### 6. Photocatalytic CO<sub>2</sub> Reduction:

The Photocatalytic experiments were conducted in an air-tight 15ml test tube with a rubber septum and were accompanied by magnetic stirring. The headspace of the vial was 12mL. A reaction mixture (3.0 mL) was bubbled with CO<sub>2</sub> for 40 min and then irradiated with a Xe light setup ( $\lambda > 400 \text{ nm}$ )/ 390nm (Kessil lamp model: PR160L) and 427 nm (Kessil lamp model: PR160L). The gas detected with Gas Chromatography (GC) was performed on a Thermo Scientific Carbon plot gas chromatograph using a DB-5 ms capillary column (30 m  $\times$  0.25 mm  $\times$  0.25  $\mu\text{m}$ , J&W Scientific) with helium as the carrier gas.

#### 7. General Procedure for the Synthesis of NDPA (H<sub>3</sub>L) Ligand:

##### A. Synthesis of *N*-(4-isopropylphenyl)-1*H*-pyrrole-2-carboxamide (**A**):

Pyrrole-2-carboxylic acid (1gm, 9mmol) and HATU (4.11gm, 10.8mmol) were added to a two-neck round bottom flask under an N<sub>2</sub> atmosphere. 10 mL of DMF was added to this mixture, followed by DIPEA (4.7mL, 27mmol). This was allowed to stir at room temperature for 30 minutes. 4-isopropylaniline (2.46mL, 18mmol) was added dropwise to this solution. The resultant mixture was stirred at room temperature for 8 hours. The organic layer was extracted in DCM and washed with 2(M) HCl, saturated aqueous sodium bicarbonate solution, and brine. The title compound was purified by column chromatography in ethyl acetate-hexane as the eluent and yielded a white crystalline solid. (1.63gm, 7.14mmol). Yield: 79.3%

<sup>1</sup>H NMR (500 MHz, CDCl<sub>3</sub>):  $\delta$  9.83 (s, 1H), 7.60 (s, 1H), 7.51 (d,  $J = 7.5 \text{ Hz}$ , 2H), 7.21 (d,  $J = 8.5 \text{ Hz}$ , 2H), 6.98 (s, 1H), 6.71 (s, 1H), 6.28 (s, 1H), 2.90 (hept,  $J = 6.9 \text{ Hz}$ , 1H).

<sup>13</sup>C NMR (126 MHz, CDCl<sub>3</sub>):  $\delta$  159.47, 145.38, 135.78, 127.37, 126.46, 122.69, 120.62, 110.47, 109.74, 34.00, 24.42.

##### B. Synthesis of 5,5'-(phenylmethylene)bis(*N*-(4-isopropylphenyl)-1*H*-pyrrole-2-carboxamide) (**B**):

(A) (1gm, 4.38mmol) and p-nitrobenzaldehyde (315.2mg, 2.09mmol) were taken in a two-neck round bottom flask. To this was added a catalytic amount of PTSA (~5mg) and refluxed in a Dean-Stark setup for 6h, yielding a pink precipitate. This was allowed to cool to room temperature, filtered, washed repeatedly with n-hexane, and dried under vacuum to yield a pink solid. (1.13gm, 1.92mmol) Yield: 91.87%

<sup>1</sup>H NMR (500 MHz, DMSO-*d*<sup>6</sup>):  $\delta$  11.74 (s, 2H), 9.66 (s, 2H), 8.20 (d,  $J = 8.6 \text{ Hz}$ , 2H), 7.61 (d,  $J = 8.5 \text{ Hz}$ , 4H), 7.43 (d,  $J = 8.7 \text{ Hz}$ , 2H), 7.18 (d,  $J = 8.4 \text{ Hz}$ , 4H), 7.01 (s, 2H), 5.93 (s, 2H), 5.81 (s, 1H), 2.84 (p,  $J = 7.0 \text{ Hz}$ , 2H), 1.18 (d,  $J = 7.0 \text{ Hz}$ , 12H).

<sup>13</sup>C NMR (126 MHz, DMSO-*d*<sup>6</sup>):  $\delta$  158.96, 150.15, 146.13, 143.03, 137.01, 136.12, 129.38, 126.28, 126.02, 123.48, 120.05, 111.39, 108.51, 59.75, 42.57, 32.88, 23.98, 20.76, 14.09.

##### C. Synthesis of 5,5'-((4-aminophenyl)methylene)bis(*N*-(4-isopropylphenyl)-1*H*-pyrrole-2-carboxamide) (**C**):

(B) (1gm, 1.70mmol) was dissolved in dry THF, and 10% Pd/C (18mg) was added. The mixture was saturated with H<sub>2</sub> and stirred at room temperature for 4h. The Pd/C was then removed by filtration, and the solvent was removed in vacuo. The residue was washed with ether to give (3) an off-white solid. The next step was proceeded without further purification.

**D. Synthesis of 5,5'-((4-pivalamidophenyl)methylene)bis(N-(4-isopropylphenyl)-1H-pyrrole-2-carboxamide) (D):**

(C) (750mg, 1.34mmol) was dissolved in dry THF in a two-neck round bottom flask under N<sub>2</sub>. This was cooled to 0°C, followed by the addition of triethylamine (205.45μL, 1.47 mmol). Pivaloyl Chloride was added (196.83μL, 1.61 mmol), and the mixture was allowed to stir at 0°C for 15 minutes. Then it was allowed to come to room temperature and was stirred for 12h until a white precipitate of triethylamine hydrochloride was formed, and the solution turned orange. The solid was filtered off, and the organic layer was extracted in ethyl acetate and washed with 2(M) HCl, saturated aqueous sodium bicarbonate solution, and brine to give a light orange solid (D), which was further purified by column chromatography. (702mg, 1.09mmol) Yield: 81.37%

<sup>1</sup>H NMR (500 MHz, DMSO-*d*<sup>6</sup>): δ 11.53 (s, 2H), 9.90 (s, 1H), 9.60 (s, 2H), 7.60 (d, *J* = 8.7 Hz, 4H), 7.50 (d, *J* = 8.7 Hz, 2H), 7.17 (d, *J* = 8.7 Hz, 4H), 7.11 (d, *J* = 8.9 Hz, 2H), 6.97 – 6.94 (m, 2H), 5.88 – 5.85 (m, 2H), 5.56 (s, 1H), 2.83 (p, *J* = 6.9 Hz, 2H), 2.02 (s, 3H), 1.18 (d, *J* = 6.9 Hz, 12H).

<sup>13</sup>C NMR (126 MHz, DMSO-*d*<sup>6</sup>): δ 168.30, 159.14, 143.11, 137.96, 137.24, 128.49, 126.43, 125.68, 120.15, 119.04, 111.62, 108.21, 42.50, 33.02, 25.29, 24.14.

**E. Synthesis of (Z)-N-(4-isopropylphenyl)-5-((5-((4-isopropylphenyl)carbamoyl)-2H-pyrrol-2-ylidene)(4-pivalamidophenyl)methyl)-1H-pyrrole-2-carboxamide (NDPA) (H<sub>3</sub>L)**

(D) (2gm, 3.11mmol) was dissolved in dry THF in a two-neck round bottom flask under an inert atmosphere. This was allowed to cool to 0°C. DDQ (846.18mg, 3.73mmol) was weighed and dissolved in dry THF under an inert atmosphere in another two-neck round bottom flask. Following this, the DDQ solution was added dropwise over a period of 30 minutes to (D) until the color changed from orange to deep purple and eventually dark red. The mixture was allowed to come to room temperature and stirred for 4h. The THF was removed in vacuo, and the organic layer was extracted in ethyl acetate and washed with saturated aqueous sodium bicarbonate solution and brine to yield a bright red solid. This was further purified by column chromatography in neutral alumina media, with ethyl acetate-hexane as the eluent. The title compound was eluted as a bright red band and was dried in vacuo to give a fine red powder (1.77g, 2.76 mmol). Yield: 88.93%

<sup>1</sup>H NMR (500 MHz, DMSO-*d*<sup>6</sup>): δ 11.58 (d, *J* = 5.2 Hz, 2H), 9.64 (s, 2H), 9.20 (s, 1H), 7.64 (d, *J* = 8.5 Hz, 4H), 7.60 (d, *J* = 8.7 Hz, 2H), 7.18 (d, *J* = 8.7 Hz, 4H), 7.14 (d, *J* = 8.7 Hz, 2H), 7.00 (s, 2H), 5.89 (s, 2H), 5.60 (s, 1H), 2.84 (hept, *J* = 6.9 Hz, 2H), 1.23 (s, 9H), 1.19 (d, *J* = 6.9 Hz, 12H).

<sup>13</sup>C NMR (126 MHz, DMSO-*d*<sup>6</sup>): δ 177.08, 159.36, 149.34, 145.73, 144.11, 141.05, 136.53, 131.92, 130.44, 126.62, 125.06, 120.18, 119.03, 107.14, 33.11, 30.58, 27.29, 23.72.

HR-MS: 642.3446 [M+H]<sup>+</sup>

**F. Synthesis of deprotonated NDPA ligand (L<sup>3-</sup>):**

100mg of NDPA(H<sub>3</sub>L) (155.81μmol) was taken into a Schlenk tube inside the glove box and dissolved in ~8mL of Na-dried THF. To this orange solution, KH (3.3 eq., 514 μmol) was added. The color immediately changes to dark pink with the evolution of hydrogen. It was kept for 4h of stirring. For all the UV-vis and fluorescence studies, 3eq. of 18-Crown-6 (467.43 μmol) was added into the solution to stabilize the trianionic ligand.

<sup>1</sup>H NMR (500 MHz, DMSO-*d*<sup>6</sup>): δ 7.32 (s, 1H), 7.21 (d, *J* = 8.7 Hz, 4H), 7.08 (d, *J* = 8.5 Hz, 2H), 6.88 (d, *J* = 8.5 Hz, 1H), 6.78 (d, *J* = 8.7 Hz, 4H), 6.61 (s, 1H), 6.39 (s, 1H), 6.13 (s, 1H), 5.74 (s, 1H), 5.61 (s, 1H), 2.70 (m, 2H), 1.13 (d, *J* = 6.9 Hz, 12H), 1.07 (s, 9H).

**8. General Procedure for the Synthesis of K[CuNDPA] (Complex 1):**

100mg of NDPA (H<sub>3</sub>L) (155.81μmol) was weighed into a Schlenk round bottom flask inside the glove box and dissolved in ~8mL of Na-dried THF. To this orange solution, KH (3.3 eq., 514 μmol) was added. The color immediately changed to dark pink with the evolution of H<sub>2</sub>. This was left to stir for 30 minutes, followed by the addition of anhydrous CuCl<sub>2</sub> (20.95mg, 155.81 μmol). Immediately, the color changed to dark purple. After

stirring it under an inert atmosphere for 4 hours, the solution was filtered inside the glove box. The residue was solvated in dry, distilled acetonitrile, which separated the metal complex from the unreacted  $\text{CuCl}_2$ . The resulting solution was bright purple, and the solvent was removed by dry distillation to yield a purple-colored solid (79mg, 112.48  $\mu\text{mol}$ ). This complex was taken in acetonitrile, and 1.1 eq. of 18-crown-6 was added to this purple solution. A single crystal was obtained in acetonitrile diffused with  $\text{Et}_2\text{O}$ . Yield: 72.19%

Analytical Calculation for  $\text{C}_{52}\text{H}_{64}\text{CuKN}_5\text{O}_9$ (1)  $f_w=1004.3637$ : (*expected*) C= 62.10, H= 6.41, N= 6.96; (*observed*) C= 61.71, H= 6.45, N= 6.91

UV-vis (in  $\text{CH}_3\text{CN}$ ):  $\lambda$ , nm ( $\epsilon$ ,  $\text{M}^{-1} \text{cm}^{-1}$ ): 378nm (13042  $\text{M}^{-1} \text{cm}^{-1}$ ), 558nm (8079  $\text{M}^{-1} \text{cm}^{-1}$ ), 598nm (8437  $\text{M}^{-1} \text{cm}^{-1}$ )

HR-MS: 701.27 [M]<sup>+</sup>

### 9. General Procedure for the Synthesis of CuNDPA with $\text{N}_2\text{O}_2$ coordination (Complex 3):

100mg of NDPA (**H<sub>3</sub>L**) (155.81  $\mu\text{mol}$ ) was weighed into a round bottom flask and dissolved in ~8mL of Na-dried THF. To this orange solution, anhydrous  $\text{CuCl}_2$  (20.95mg, 155.81  $\mu\text{mol}$ ) was added. Immediately, the color changed to dark red. After refluxing it for 8 hours, the solution was filtered. The residue was solvated in dry, distilled methanol. The resulting solution was dark red, and the solvent was removed in vacuo to yield a dark, red-colored solid (70 mg, 94.75  $\mu\text{mol}$ ). This complex was taken in a 1:1 methanol: ACN solution and used for crystallization via slow evaporation. Dark red crystals were obtained after a week. Yield: 60.81%

Analytical Calculation for  $\text{C}_{40}\text{H}_{42}\text{ClCuN}_5\text{O}_3$ (2)  $f_w=738.2272$ : (*expected*) C= 64.94, H= 5.72, N= 9.47; (*observed*) C= 64.47, H= 5.77, N= 9.39

UV-vis (in  $\text{CH}_3\text{CN}$ ):  $\lambda$ , nm ( $\epsilon$ ,  $\text{M}^{-1} \text{cm}^{-1}$ ): 427 nm (18324  $\text{M}^{-1} \text{cm}^{-1}$ ), 539 nm (23601  $\text{M}^{-1} \text{cm}^{-1}$ ), 563 nm (29783  $\text{M}^{-1} \text{cm}^{-1}$ )

HR-MS: 703.25 [M]<sup>+</sup>

**Scheme S1.** Synthetic scheme for the **NDPA(H<sub>3</sub>L)** ligand

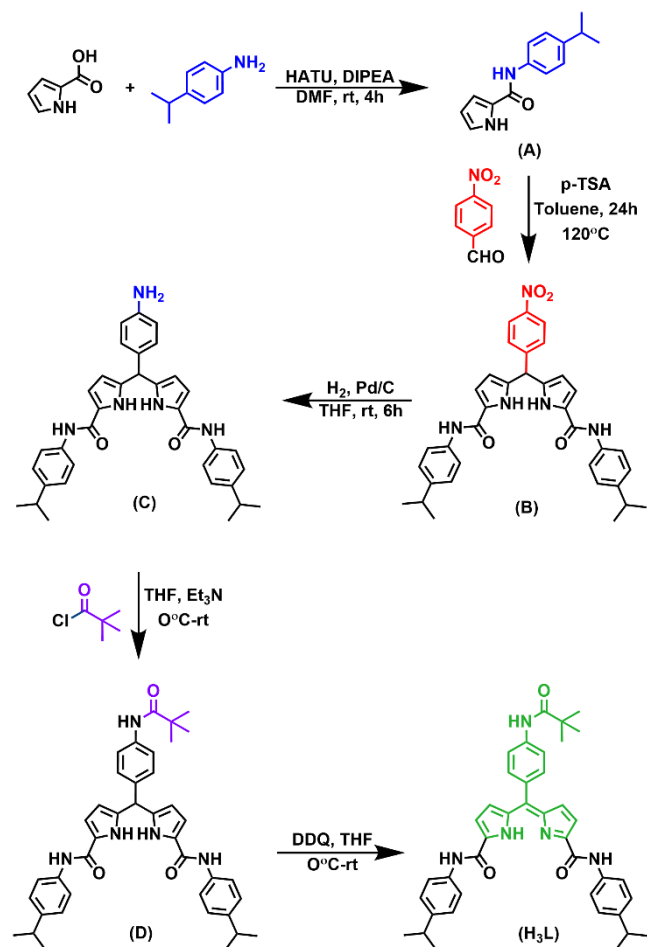

**Scheme S2.** Synthetic scheme for the **1**

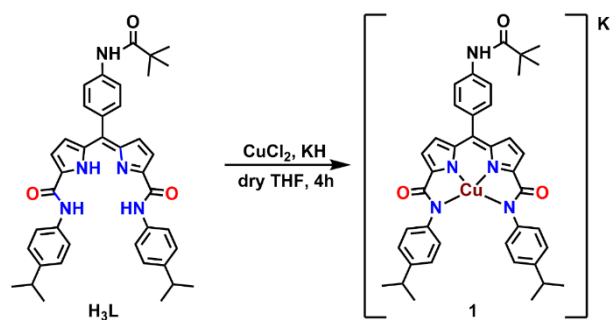



**Scheme S3.** Synthetic scheme for the **3**

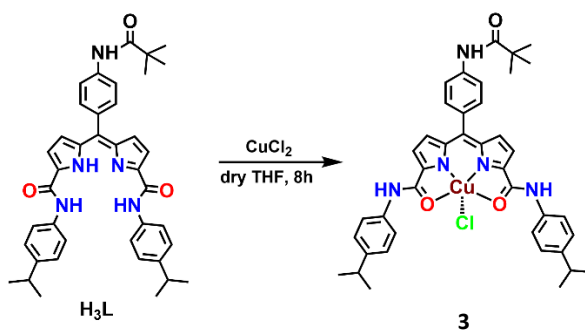

**Characterization of synthesized ligand (NDPA):**

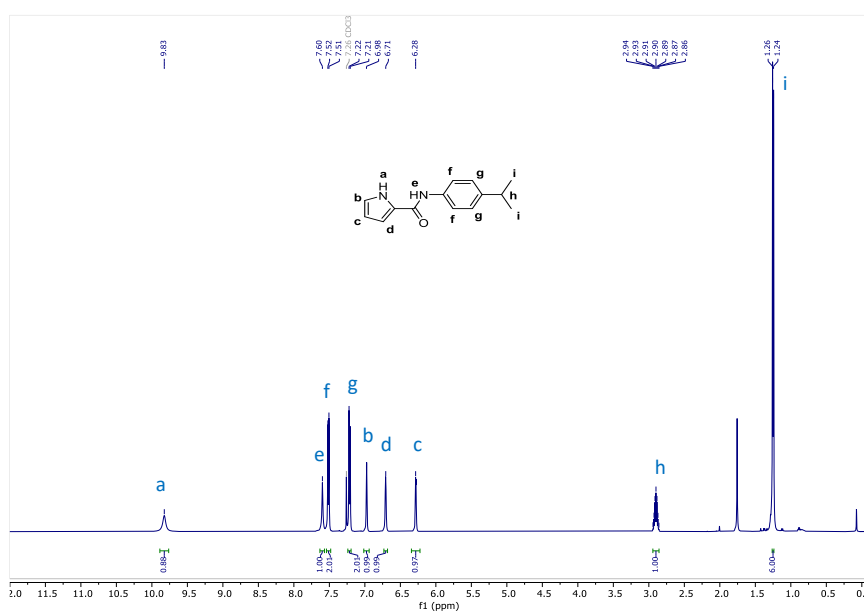

**Figure S1:** <sup>1</sup>H NMR of N-(4-isopropylphenyl)-1H-pyrrole-2-carboxamide (**A**) in CDCl<sub>3</sub>

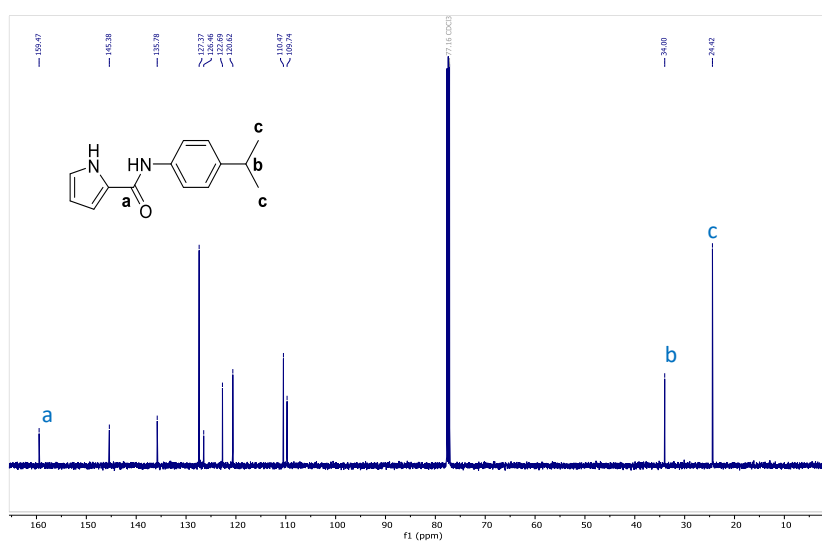

**Figure S2:** <sup>13</sup>C NMR of N-(4-isopropylphenyl)-1H-pyrrole-2-carboxamide (**A**) in CDCl<sub>3</sub>

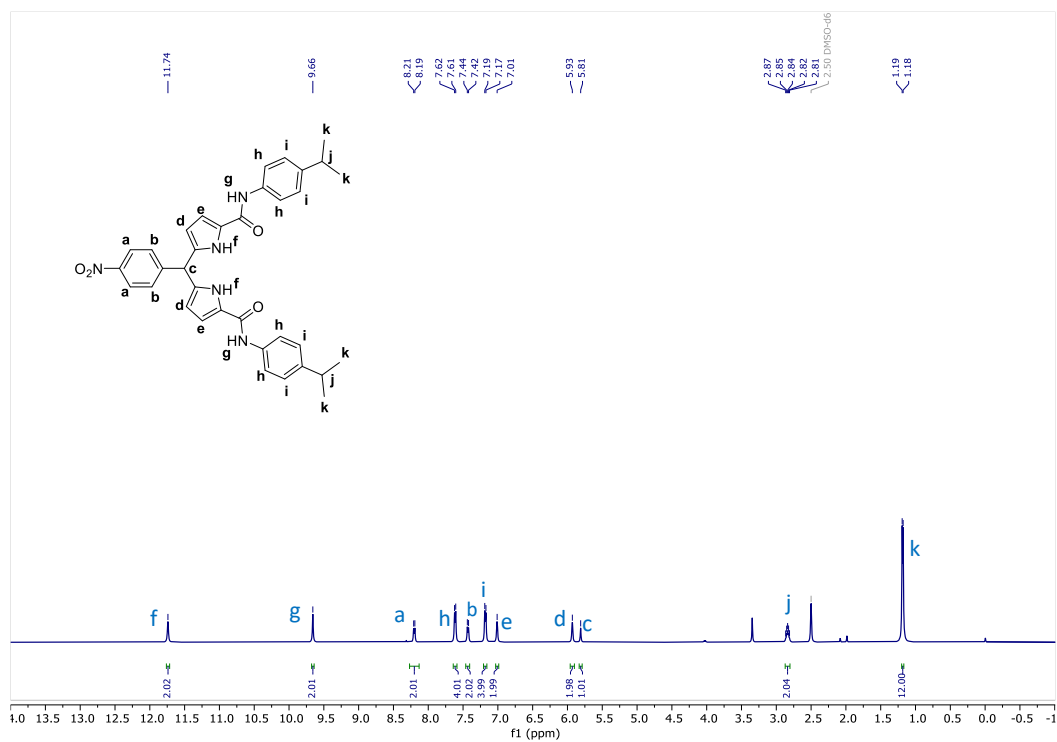

**Figure S3:**  $^1\text{H}$  NMR of 5,5'-((4-nitrophenyl)methylene)bis(N-(4-isopropylphenyl)-1H-pyrrole-2-carboxamide) (**B**) in DMSO- $d_6$

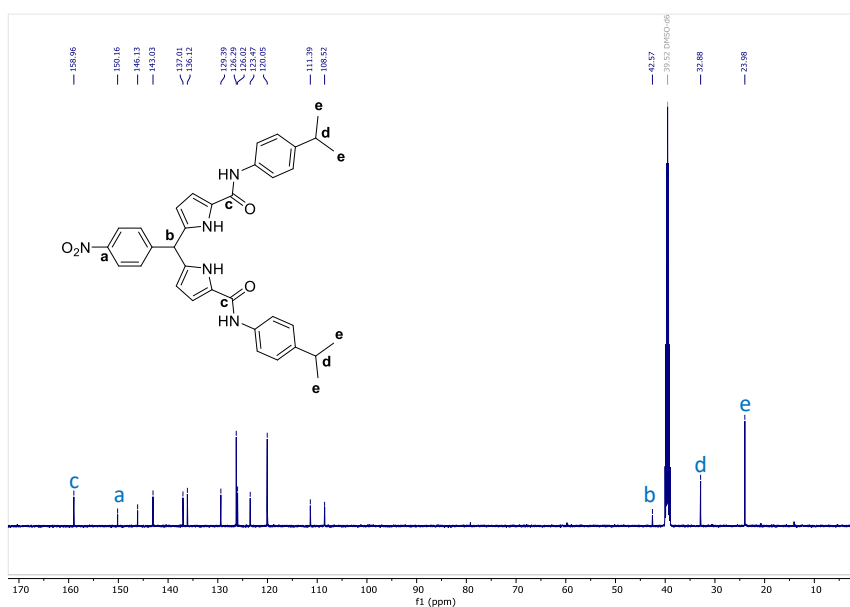

**Figure S4:**  $^{13}\text{C}$  NMR of 5,5'-((4-nitrophenyl)methylene)bis(N-(4-isopropylphenyl)-1H-pyrrole-2-carboxamide) (**B**) in  $\text{CDCl}_3$

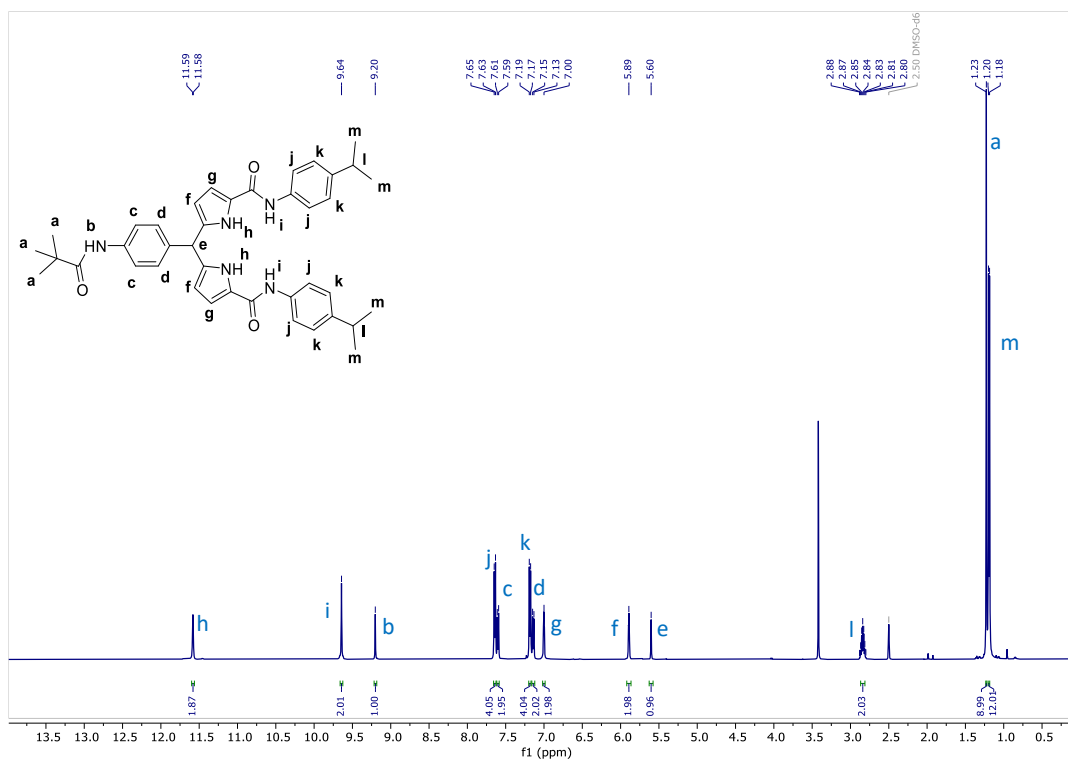

**Figure S5:** <sup>1</sup>H NMR of 5,5'-((4-pivalamidophenyl)methylene)bis(N-(4-isopropylphenyl)-1H-pyrrole-2-carboxamide) (D) in DMSO-d<sup>6</sup>

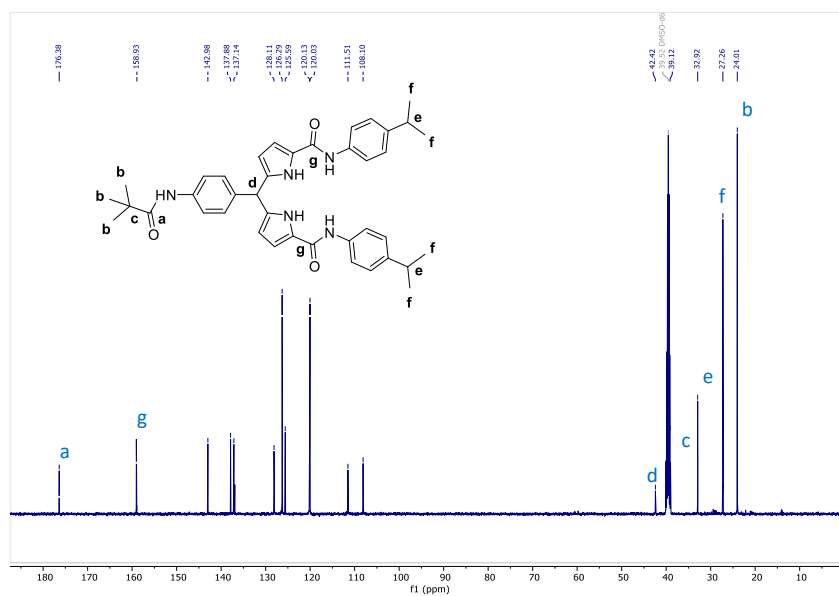

**Figure S6:** <sup>13</sup>C NMR of 5,5'-((4-pivalamidophenyl)methylene)bis(N-(4-isopropylphenyl)-1H-pyrrole-2-carboxamide) (D) in DMSO-d<sup>6</sup>

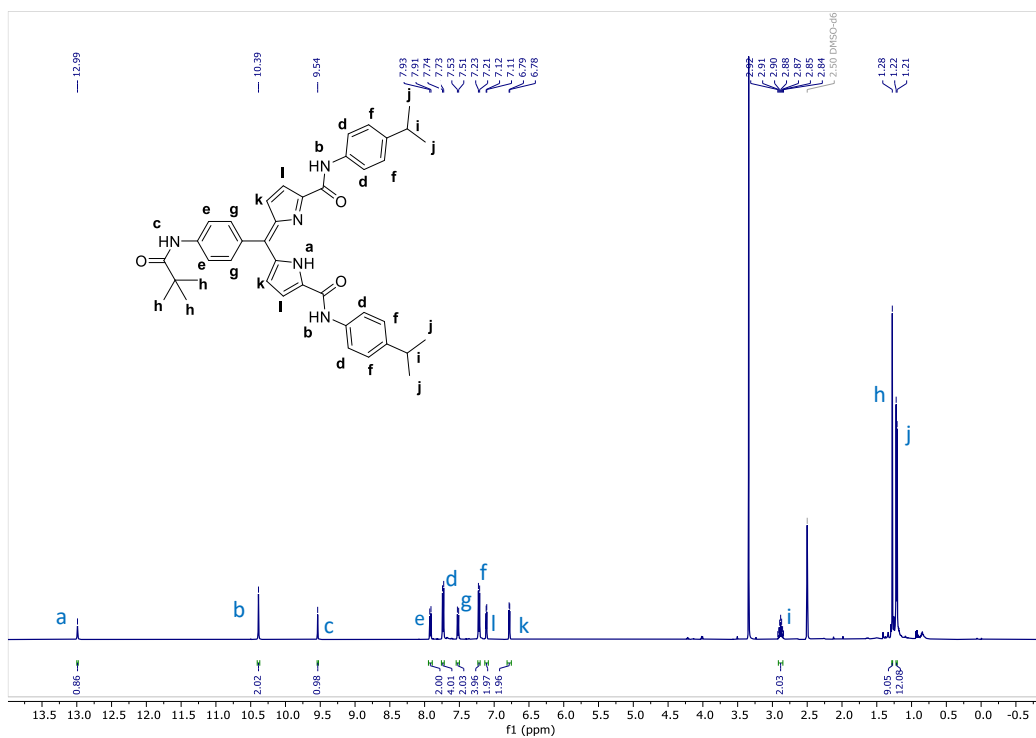

**Figure S7:**  $^1\text{H}$  NMR of (Z)-N-(4-isopropylphenyl)-5-((5-((4-isopropylphenyl)carbamoyl)-2H-pyrrol-2-ylidene)(4-pivalamidophenyl)methyl)-1H-pyrrole-2-carboxamide ( $\text{H}_3\text{L}$ ) in  $\text{DMSO-d}_6$

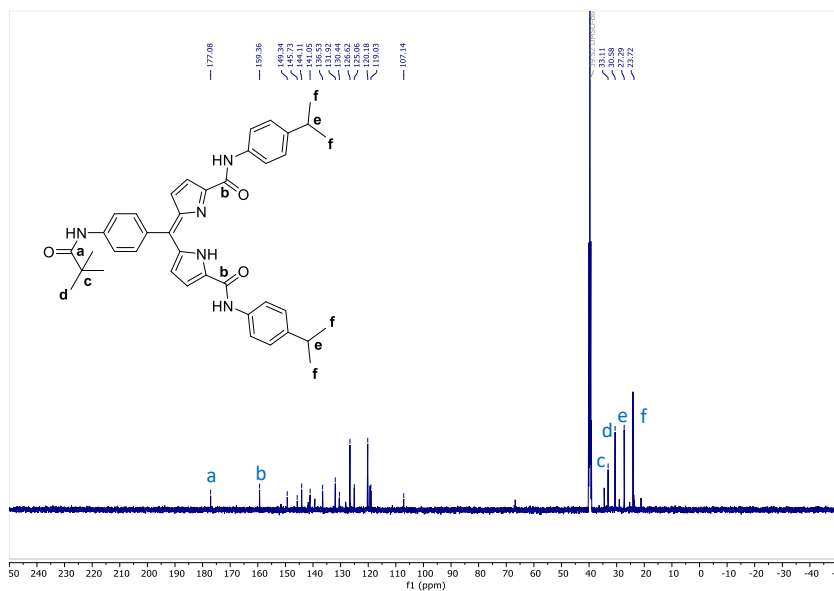

**Figure S8:**  $^{13}\text{C}$  NMR of (Z)-N-(4-isopropylphenyl)-5-((5-((4-isopropylphenyl)carbamoyl)-2H-pyrrol-2-ylidene)(4-pivalamidophenyl)methyl)-1H-pyrrole-2-carboxamide ( $\text{H}_3\text{L}$ ) in  $\text{DMSO-d}_6$

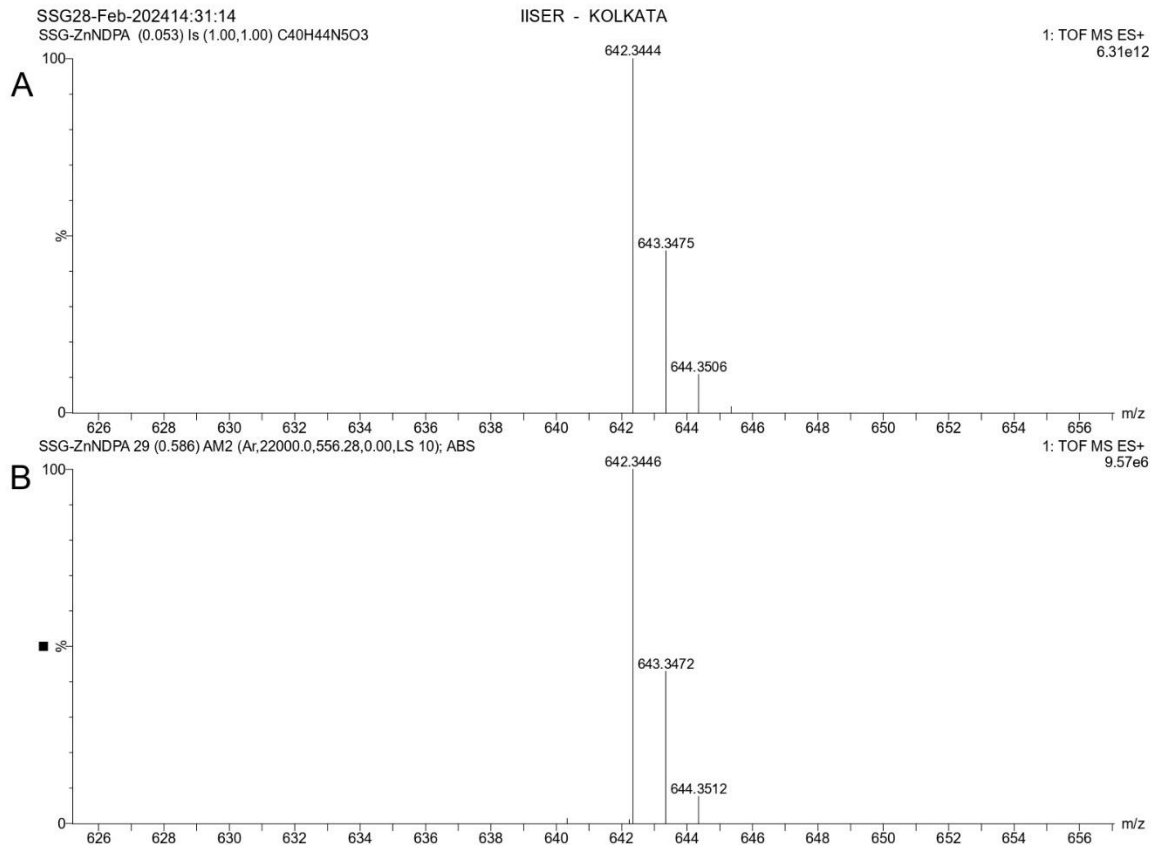

**Figure S9:** HR-MS for compound (Z)-N-(4-isopropylphenyl)-5-((4-isopropylphenyl)carbamoyl)-2H-pyrrol-2-ylidene(4-pivalamidophenyl)methyl)-1H-pyrrole-2-carboxamide (**L<sub>3</sub>**) in Methanol (m/z: **641.3366**) – (A) Simulated mass: **642.3444** [M + H]<sup>+</sup>, (B) Experimental mass: **642.3446** [M + H]<sup>+</sup>

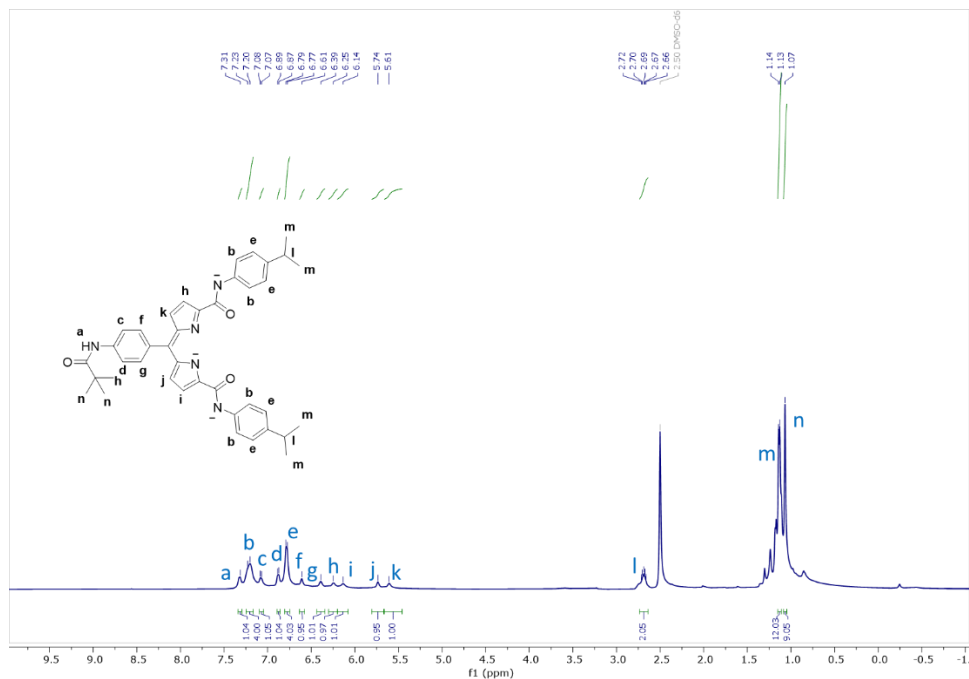

**Figure S10:** <sup>1</sup>H NMR of **L<sub>3</sub>** in DMSO-d<sub>6</sub>

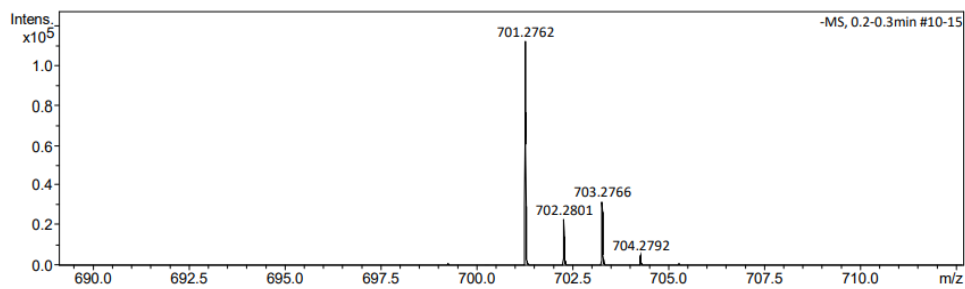

**Figure S11:** HR-MS spectra in negative ion mode for metal complex  $K[Cu(NDPA)](1)$  in Acetonitrile ( $m/z$  **701.24**) **701.27** [ $M$ ]<sup>-</sup>

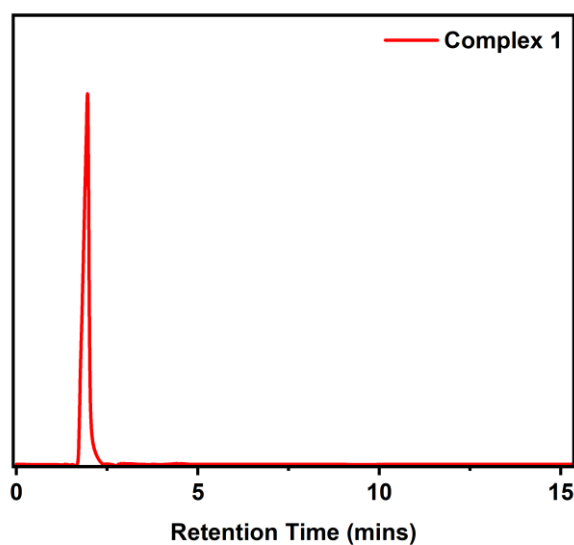

**Figure S12:** HPLC spectra of **1**

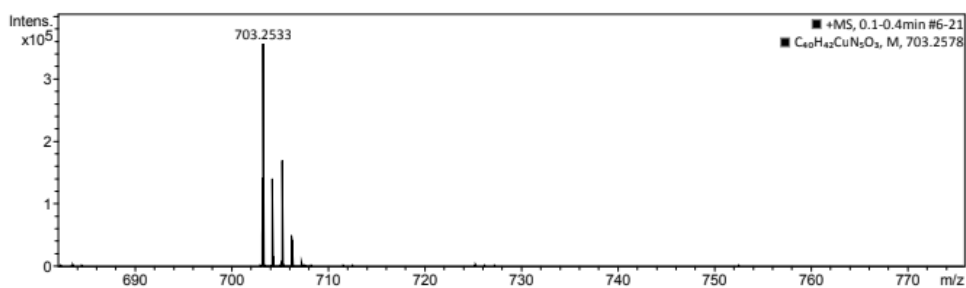

**Figure S13:** HR-MS spectra in positive ion mode for metal complex  $[Cu(NDPA)Cl]$  showing  $N_2O_2$  coordination (**3**) in Acetonitrile ( $m/z$  **703.2585**) **703.2533** [ $M$ ]<sup>+</sup>

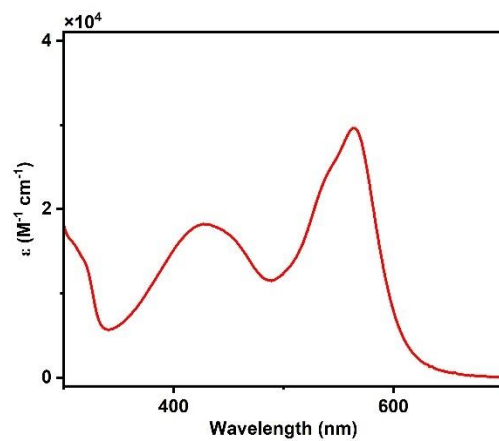

**Figure S14:** UV-vis absorption spectra of Complex **3** in acetonitrile.

## SC-XRD structural analysis of $[K^+(18\text{-crown-6})][Cu(NDPA)]$ with $N_4$ coordination

(Complex 1):

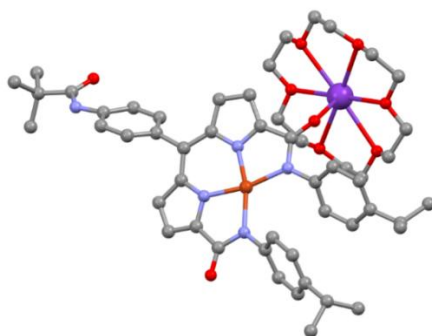

**Figure S15:** SC-XRD structure for  $[K^+(18\text{-crown-6})][Cu(NDPA)]$

|                                  |                         |
|----------------------------------|-------------------------|
| CCDC Number                      | 2313077                 |
| Identification code              | (18-C-6)K[Cu(NDPA)]     |
| Empirical formula                | $C_{54}H_{67}CuKN_6O_9$ |
| Formula weight                   | 1046.77                 |
| Crystal Colour                   | Dark Violet             |
| Temperature/K                    | 100.00(2)               |
| Crystal system                   | triclinic               |
| Space group                      | P-1                     |
| a/Å                              | 9.0901(2)               |
| b/Å                              | 13.3962(2)              |
| c/Å                              | 22.3177(3)              |
| $\alpha/^\circ$                  | 77.1960(10)             |
| $\beta/^\circ$                   | 86.4310(10)             |
| $\gamma/^\circ$                  | 82.8870(10)             |
| Volume/Å <sup>3</sup>            | 2628.01(8)              |
| Z                                | 2                       |
| $\rho_{\text{calc}}/\text{cm}^3$ | 1.323                   |
| $\mu/\text{mm}^{-1}$             | 1.792                   |
| F(000)                           | 1106.0                  |
| Crystal size/mm <sup>3</sup>     | 0.08 × 0.04 × 0.02      |



|                                                        |                                                               |
|--------------------------------------------------------|---------------------------------------------------------------|
| Radiation                                              | Cu K $\alpha$ ( $\lambda = 1.54184$ )                         |
| Index ranges                                           | $-10 \leq h \leq 10, -16 \leq k \leq 13, -26 \leq l \leq 26$  |
| Reflections collected                                  | 9566                                                          |
| Independent reflections                                | 8628 [ $R_{\text{int}} = 0.0777, R_{\text{sigma}} = 0.0350$ ] |
| Data/restraints/parameters                             | 9166/0/648                                                    |
| Goodness-of-fit on $F^2$                               | 1.073                                                         |
| Final R indexes [ $I \geq 2\sigma(I)$ ] <sup>a,b</sup> | $R_1 = 0.0373^a, wR_2 = 0.1010^b$                             |
| Final R indexes [all data] <sup>a,b</sup>              | $R_1 = 0.0409^a, wR_2 = 0.1038^b$                             |

$$^a R_1 = \frac{\sum ||F_o| - |F_c||}{\sum |F_o|}, \quad ^b wR_2 = \left\{ \frac{\sum [w (|F_o|^2 - |F_c|^2)^2]}{\sum [w (|F_o|^2)^2]} \right\}^{1/2}$$

**Table S1:** Crystal Data and Data Collection Parameters for K[Cu(NDPA)](1)

| Table for Bond Lengths (Å) |      |            |
|----------------------------|------|------------|
| Atom                       | Atom | Length/Å   |
| Cu1                        | N1   | 1.9442(14) |
| Cu1                        | N3   | 1.9355(14) |
| Cu1                        | N4   | 2.0141(14) |
| Cu1                        | N5   | 1.9981(14) |

**Table S2:** Cu-N bond length parameters of (1)

| Table for Bond Angles (°) |      |      |           |
|---------------------------|------|------|-----------|
| Atom                      | Atom | Atom | Angle/°   |
| N4                        | Cu1  | N1   | 164.92(6) |
| N3                        | Cu1  | N5   | 166.14(6) |
| N3                        | Cu1  | N1   | 84.20(6)  |
| N3                        | Cu1  | N4   | 81.29(6)  |
| N4                        | Cu1  | N5   | 112.48(6) |
| N5                        | Cu1  | N1   | 81.95(6)  |

**Table S3:** N-Cu-N bond angle parameters of Complex (1)

| Table for Bond Lengths (Å) |      |           |
|----------------------------|------|-----------|
| Atom                       | Atom | Length/Å  |
| C23                        | N4   | 1.419(2)  |
| C22                        | N4   | 1.356(2)  |
| C22                        | O3   | 1.250(2)  |
| C21                        | C22  | 1.489(14) |
| C21                        | N3   | 1.329(2)  |
| C21                        | C20  | 1.416(2)  |
| C20                        | C19  | 1.378(2)  |
| C19                        | C18  | 1.427(2)  |
| C18                        | C6   | 1.409(2)  |
| C6                         | C5   | 1.407(2)  |
| C5                         | C4   | 1.427(2)  |
| C4                         | C3   | 1.380(2)  |
| C3                         | C2   | 1.422(2)  |
| C2                         | N1   | 1.328(2)  |
| C5                         | N1   | 1.384(2)  |
| C2                         | C1   | 1.485(2)  |
| C1                         | O1   | 1.242(2)  |
| C1                         | N5   | 1.361(2)  |
| C32                        | N5   | 1.417(2)  |

**Table S4:** Table for Bond Lengths (Å) of (1)

**SC-XRD structural analysis of [Cu(NDPA)Cl] with N<sub>2</sub>O<sub>2</sub> coordination (Complex 3):**

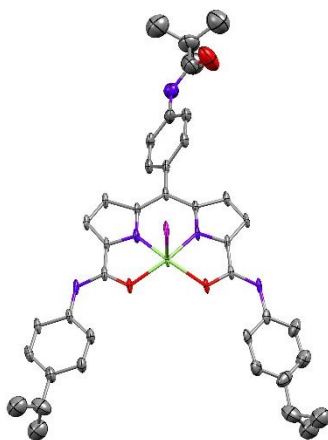

**Figure S16:** SC-XRD structure of [Cu(NDPA)Cl] with N<sub>2</sub>O<sub>2</sub> coordination (Complex 3)

|                                    |                                                                   |
|------------------------------------|-------------------------------------------------------------------|
| CCDC Number                        | 2370489                                                           |
| Identification code                | CuNDPA-Cl_N <sub>2</sub> O <sub>2</sub>                           |
| Empirical formula                  | C <sub>40</sub> H <sub>48</sub> ClCuN <sub>7</sub> O <sub>3</sub> |
| Formula weight                     | 821.88                                                            |
| Crystal Colour                     | Dark Red                                                          |
| Temperature/K                      | 100.15(2)                                                         |
| Crystal system                     | triclinic                                                         |
| Space group                        | P-1                                                               |
| a/Å                                | 9.6787(3)                                                         |
| b/Å                                | 10.7885(4)                                                        |
| c/Å                                | 20.4415(8)                                                        |
| α/°                                | 96.743(3)                                                         |
| β/°                                | 90.805(3)                                                         |
| γ/°                                | 99.865(3)                                                         |
| Volume/Å <sup>3</sup>              | 2087.09(13)                                                       |
| Z                                  | 2                                                                 |
| ρ <sub>calc</sub> /cm <sup>3</sup> | 1.308                                                             |
| μ/mm <sup>-1</sup>                 | 1.708                                                             |

|                                             |                                                                              |
|---------------------------------------------|------------------------------------------------------------------------------|
| F(000)                                      | 862.0                                                                        |
| Crystal size/mm <sup>3</sup>                | 0.4 × 0.3 × 0.2                                                              |
| Radiation                                   | Cu Kα (λ = 1.54184)                                                          |
| Index ranges                                | -11 ≤ h ≤ 11, -10 ≤ k ≤ 12, -24 ≤ l ≤ 24                                     |
| Reflections collected                       | 40872                                                                        |
| Independent reflections                     | 7376 [R <sub>int</sub> = 0.0643, R <sub>sigma</sub> = 0.0397]                |
| Data/restraints/parameters                  | 7376/116/431                                                                 |
| Goodness-of-fit on F <sup>2</sup>           | 1.400                                                                        |
| Final R indexes [I ≥ 2σ (I)] <sup>a,b</sup> | R <sub>1</sub> = 0.1256 <sup>a</sup> , wR <sub>2</sub> = 0.3404 <sup>b</sup> |
| Final R indexes [all data] <sup>a,b</sup>   | R <sub>1</sub> = 0.1406 <sup>a</sup> , wR <sub>2</sub> = 0.3535 <sup>b</sup> |

$${}^aR_1 = \frac{\sum ||F_o| - |F_c||}{\sum |F_o|}, {}^b wR_2 = \left\{ \frac{\sum [w (|F_o|^2 - |F_c|^2)^2]}{\sum [w (|F_o|^2)^2]} \right\}^{1/2}$$

**Table S5:** Crystal Data and Data Collection Parameters for [Cu(NDPA)Cl](3)

| Table for Bond Lengths (Å) |      |            |
|----------------------------|------|------------|
| Atom                       | Atom | Length/Å   |
| Cu1                        | N1   | 1.893(5)   |
| Cu1                        | N3   | 1.913(5)   |
| Cu1                        | O1   | 2.045(4)   |
| Cu1                        | O3   | 2.014(4)   |
| Cu1                        | Cl1  | 2.5876(16) |

**Table S6:** Cu-N, Cu-O, and Cu-Cl bond length parameters of (3)

| Table for Bond Angles (°) |      |      |            |
|---------------------------|------|------|------------|
| Atom                      | Atom | Atom | Angle/°    |
| O1                        | Cu1  | Cl1  | 97.48(12)  |
| O3                        | Cu1  | O5   | 107.53(17) |
| O3                        | Cu1  | Cl1  | 93.85(12)  |
| N3                        | Cu1  | O1   | 159.99(18) |
| N3                        | Cu1  | O3   | 81.77(19)  |
| N3                        | Cu1  | Cl1  | 99.55(15)  |

|    |     |     |            |
|----|-----|-----|------------|
| N1 | Cu1 | O1  | 81.81(19)  |
| N1 | Cu1 | O3  | 165.85(18) |
| N1 | Cu1 | N3  | 86.2(2)    |
| N1 | Cu1 | Cl1 | 91.44(14)  |

**Table S7:** N-Cu-N bond angle parameters of Complex (3)

| Table for Bond Lengths (Å) |      |           |
|----------------------------|------|-----------|
| Atom                       | Atom | Length/Å  |
| C23                        | N4   | 1.396(9)  |
| C22                        | N4   | 1.348(7)  |
| C22                        | O3   | 1.263 (7) |
| C21                        | C22  | 1.464(9)  |
| C21                        | N3   | 1.340(7)  |
| C21                        | C20  | 1.418(9)  |
| C20                        | C19  | 1.353(9)  |
| C19                        | C18  | 1.435(7)  |
| C18                        | C6   | 1.429(8)  |
| C6                         | C5   | 1.445(8)  |
| C5                         | C4   | 1.433(7)  |
| C4                         | C3   | 1.372(9)  |
| C3                         | C2   | 1.425(8)  |
| C2                         | N1   | 1.340(7)  |
| C5                         | N1   | 1.345(8)  |
| C2                         | C1   | 1.441(9)  |
| C1                         | O1   | 1.280(6)  |
| C1                         | N5   | 1.331(7)  |
| C32                        | N5   | 1.405(7)  |

**Table S8:** Table for Bond Lengths (Å) of Complex 3

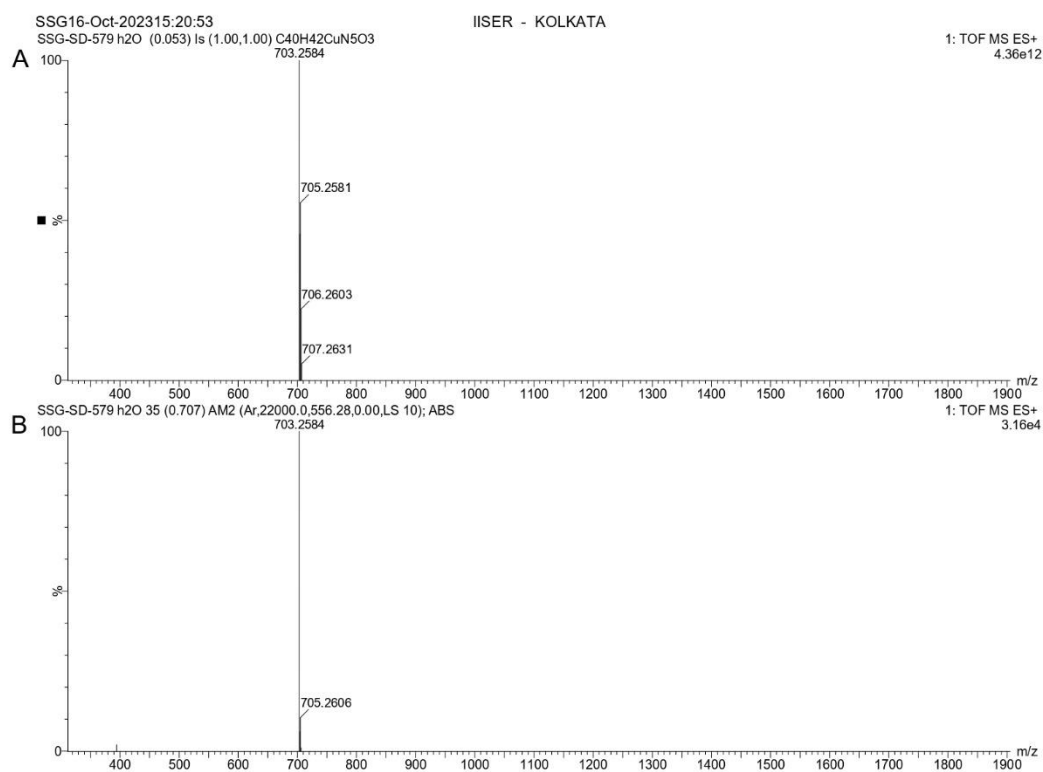

**Figure S17:** HR-MS spectra of **2** ( $m/z$ : **702.2505**) in positive ion mode after the addition of H<sub>2</sub>O in the acetonitrile solution of **1** – (A) Simulated mass: **703.2584** [M + H]<sup>+</sup>, (B) Experimental mass: **703.2584** [M + H]<sup>+</sup>

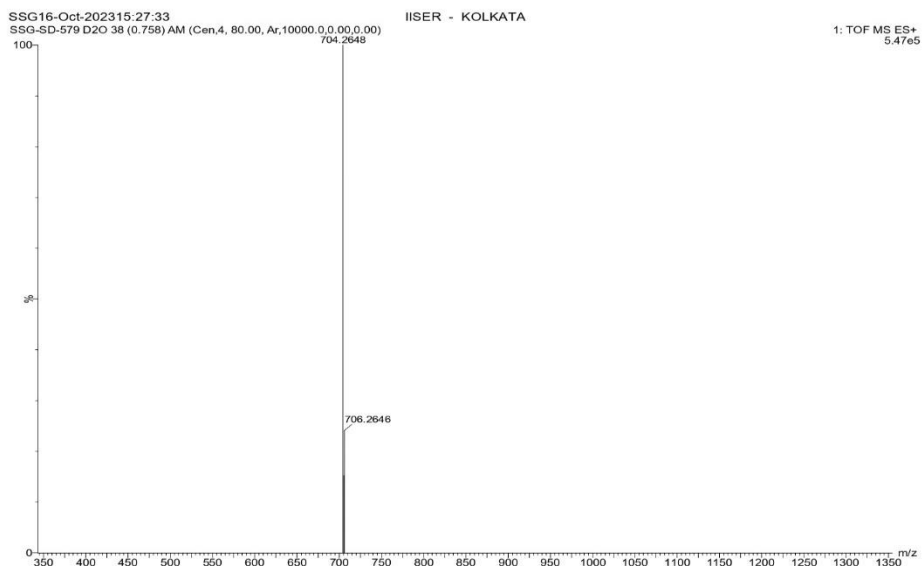

**Figure S18:** HR-MS spectra of **2** in positive ion mode after the addition of D<sub>2</sub>O in the acetonitrile solution of **1** (expected  $m/z$ : **704.2646**, observed  $m/z$ : **704.2648**)

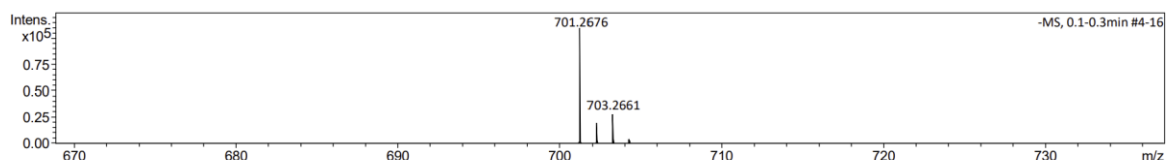

**Figure S19:** HR-MS spectra of **2** in negative ion mode after the addition of Et<sub>3</sub>N in the acetonitrile solution  
701.2676 [M<sup>-</sup>]

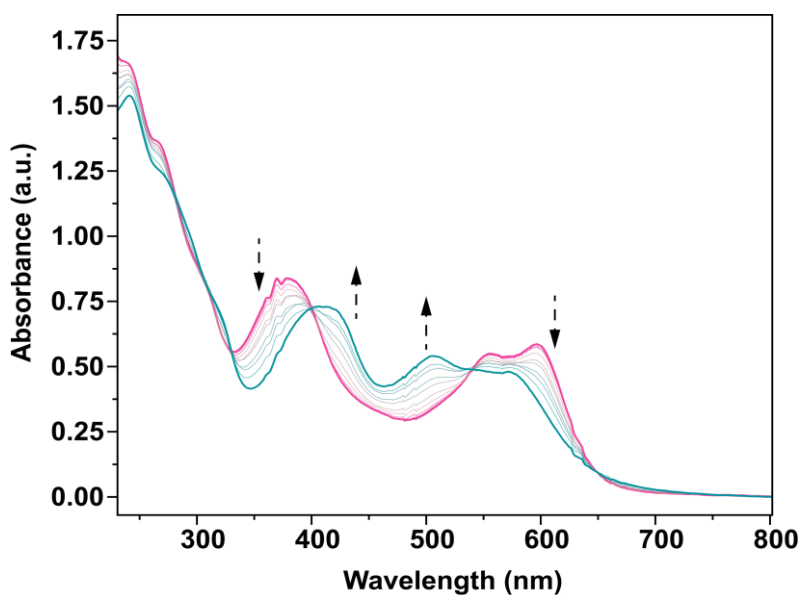

**Figure S20:** Absorption spectral change due to the coordination change from N<sub>4</sub>(**1**), pink spectrum, to N<sub>3</sub>O(**2**), blue spectrum, with the addition of 13 μM water per addition/scan; overall 0.117 mM water was added for this conversion

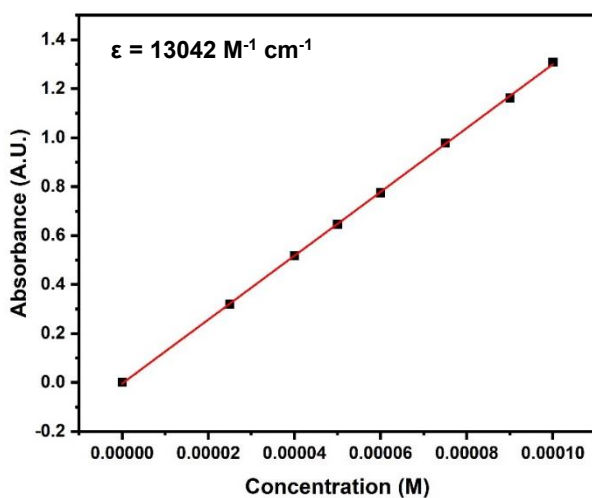

**Figure S21:** Molar absorption coefficient (M<sup>-1</sup>cm<sup>-1</sup>) of **1** for 378 nm peak

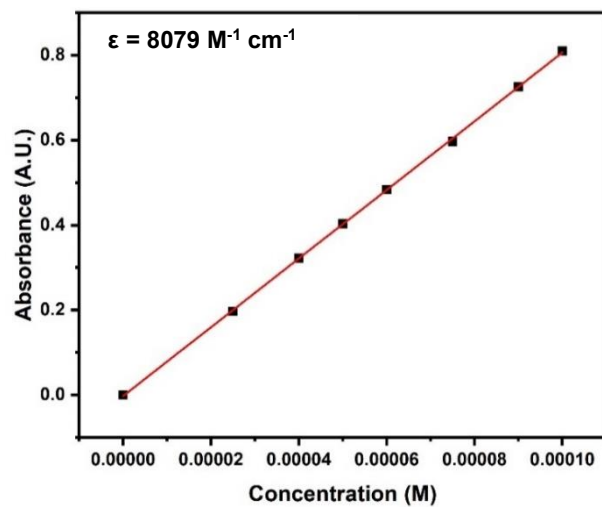

Figure S22: Molar absorption coefficient ( $\text{M}^{-1}\text{cm}^{-1}$ ) of **1** for 556 nm peak

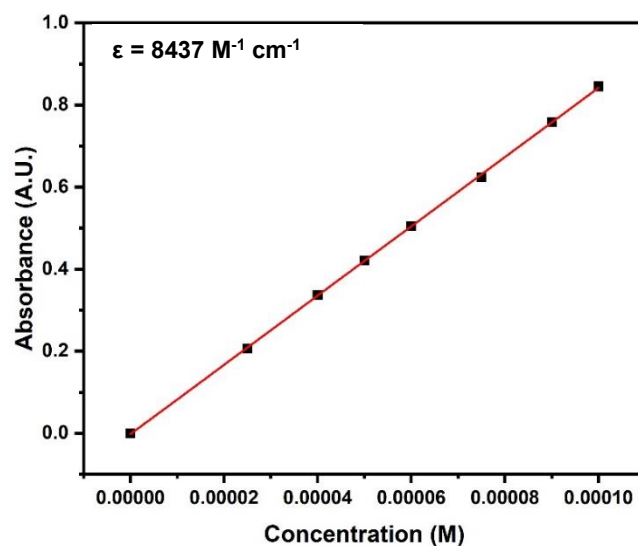

Figure S23: Molar absorption coefficient ( $\text{M}^{-1}\text{cm}^{-1}$ ) of **1** for 598 nm peak



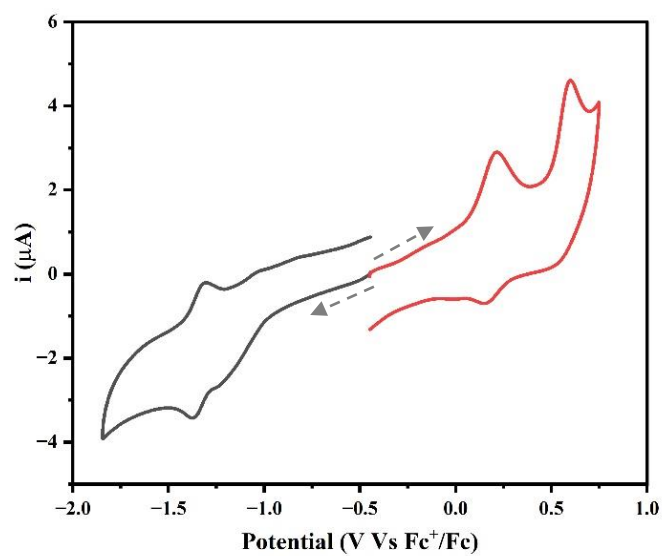

**Figure S24:** Cyclic voltammogram of 0.5 mM **1** in Ar-saturated acetonitrile with 0.1 M TBAPF<sub>6</sub>. WE: GC, RE: Ag/AgCl, CE: Pt wire, Scan rate: 100 mV s<sup>-1</sup>

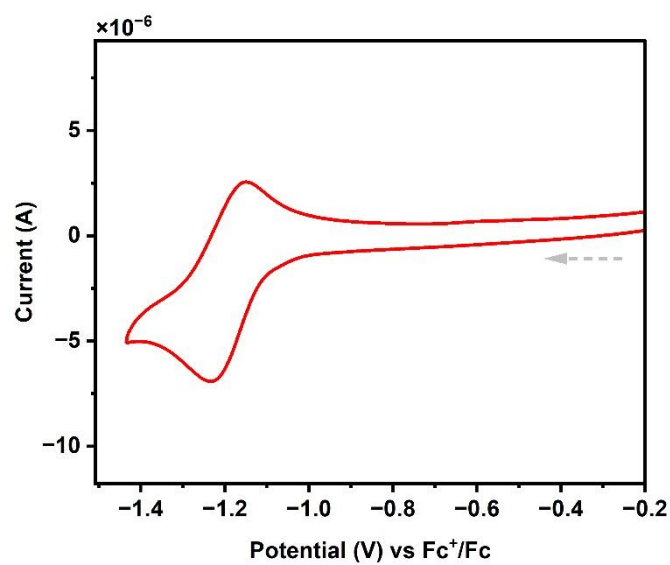

**Figure S25:** Cyclic voltammogram of H<sub>3</sub>L in Ar-saturated acetonitrile with 0.1 M TBAPF<sub>6</sub>. WE: GC, RE: Ag/AgCl, CE: Pt wire, Scan rate: 100 mV s<sup>-1</sup>

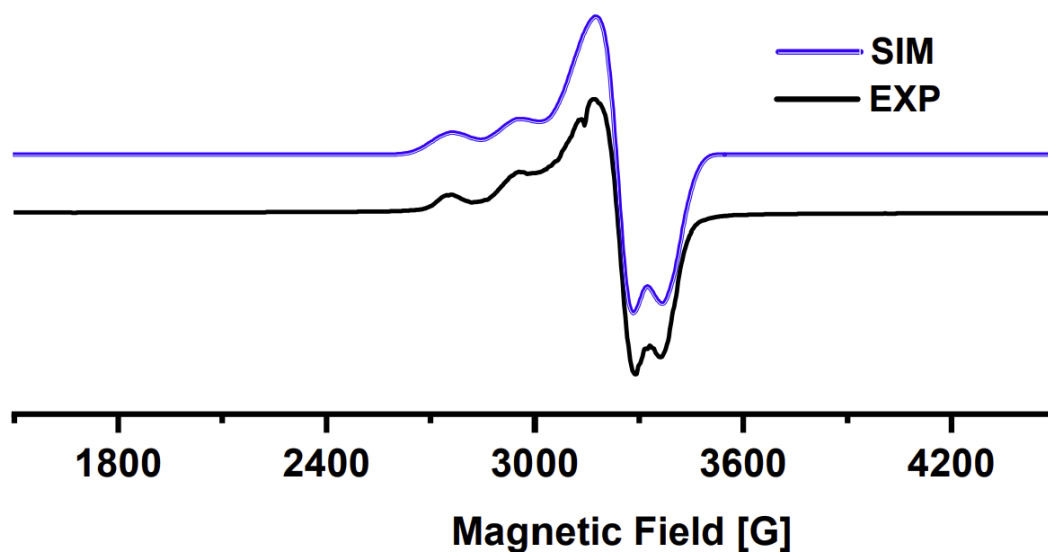

**Figure S26:** X-band EPR spectrum ( $\nu = 9.300$  GHz, power = 1.65 mW, receiver gain =  $1 \times 10^6$ , modulation frequency = 100 KHz, modulation amplitude = 10.00 G) recorded for 1 mM solution of **1** in acetonitrile: Toluene (3:1) at 90 K. The N superhyperfine splitting in the spectrum was also observed. only Cu-based ( $l = 3/2$ ) splitting was observed with corresponding  $g$ -values of  $g_{\perp} = 2.050$  and  $g_{\parallel} = 2.167$ . The simulation-derived hyperfine coupling constant parameters are as follows:  $A^{\text{Cu}_{(xx)}} = 10 \times 10^{-4} \text{ cm}^{-1}$ ,  $A^{\text{Cu}_{(zz)}} = 190 \times 10^{-4} \text{ cm}^{-1}$ ,  $A^{4\text{N}_{(xx)}} = 10 \times 10^{-4} \text{ cm}^{-1}$ ,  $A^{4\text{N}_{(yy)}} = 30 \times 10^{-4} \text{ cm}^{-1}$

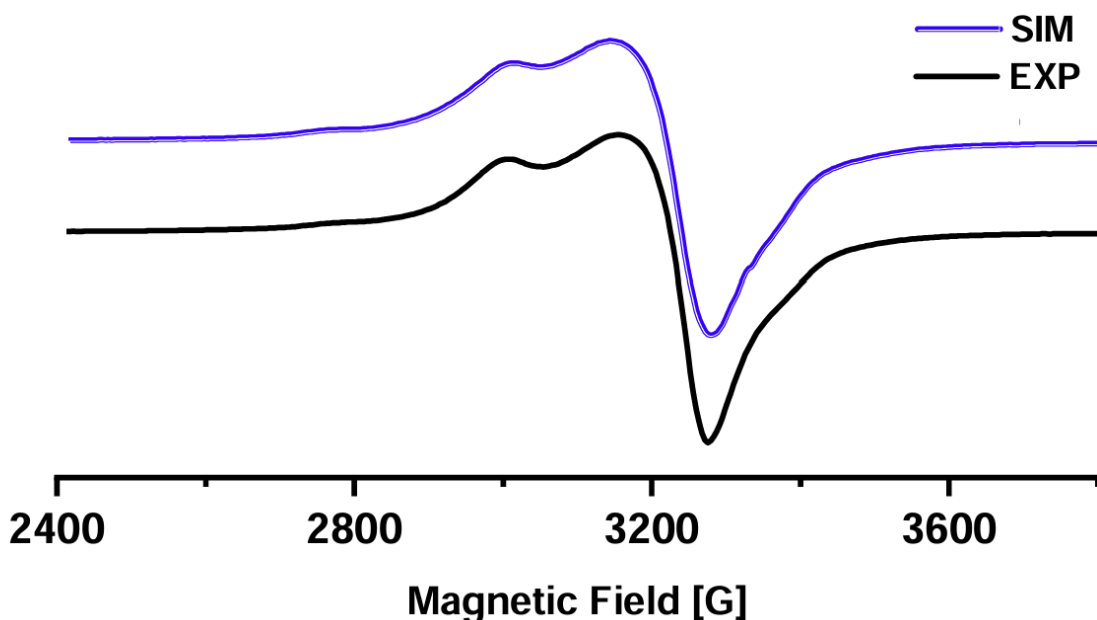

**Figure S27:** X-band EPR spectrum ( $\nu = 9.300$  GHz, power = 1.65 mW, receiver gain =  $1 \times 10^6$ , modulation frequency = 100 KHz, modulation amplitude = 10.00 G) recorded for 1 mM solution of **2** in acetonitrile: Toluene (3:1) at 90 K. No N hyperfine was noted; only Cu-based ( $l = 3/2$ ) splitting was observed with corresponding  $g$ -values of  $g_{\perp} = 2.052$  and  $g_{\parallel} = 2.271$ . The simulation-derived hyperfine coupling constant parameters are as follows:  $A^{\text{Cu}_{(xx)}} = 5 \times 10^{-4} \text{ cm}^{-1}$ ,  $A^{\text{Cu}_{(yy)}} = 20 \times 10^{-4} \text{ cm}^{-1}$ ,  $A^{\text{Cu}_{(zz)}} = 110 \times 10^{-4} \text{ cm}^{-1}$ .

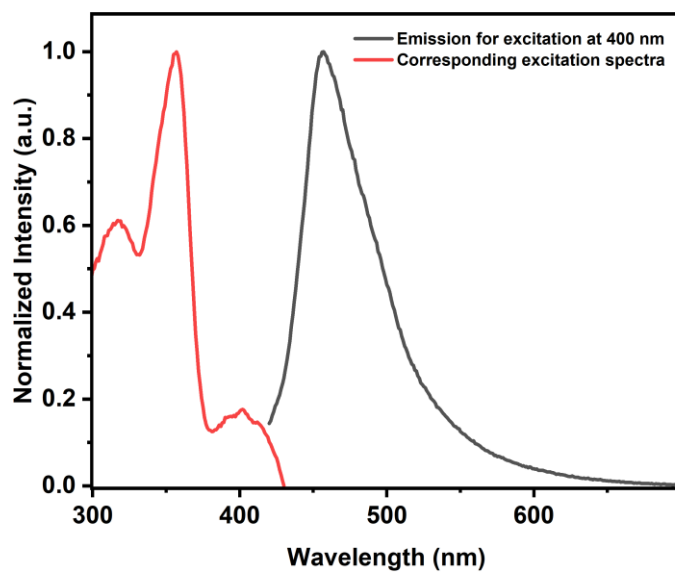

**Figure S28:** Normalized emission (excitation wavelength: 400 nm) spectra of H<sub>3</sub>L in acetonitrile

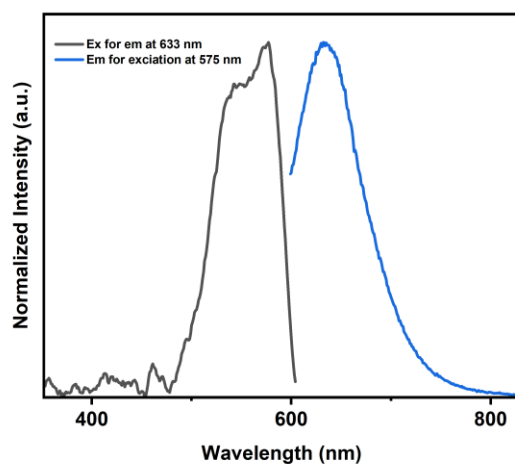

**Figure S29:** Normalized emission (excitation wavelength: 575 nm) spectra of 1 in acetonitrile

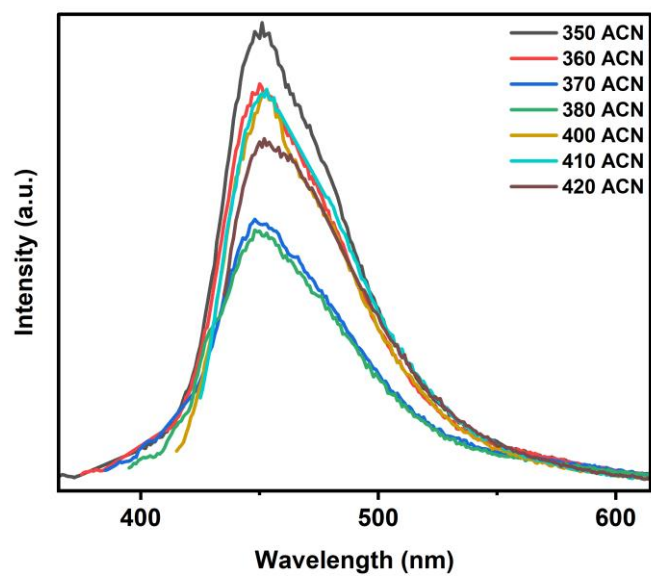

Figure S30: Emission spectra of **1** in acetonitrile for different excitation wavelength 350nm-420nm

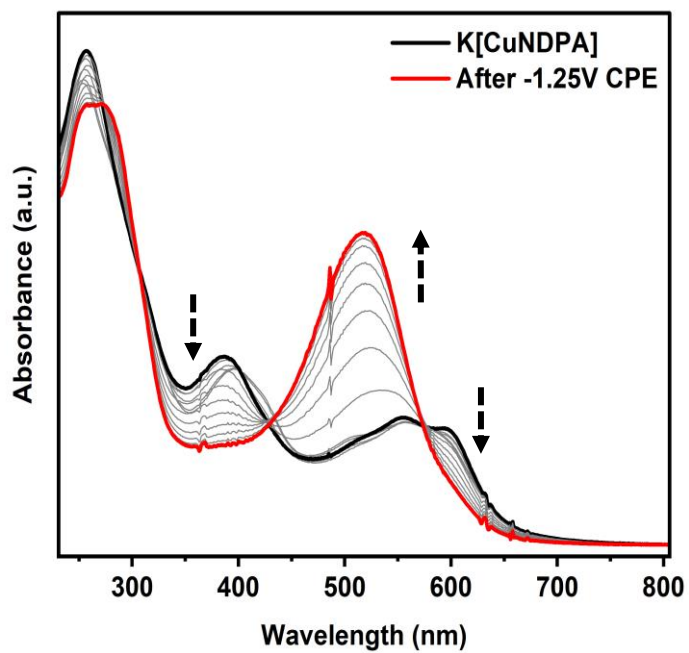

Figure S31: Absorption spectral change after CPE at -1.25V ( $Fc^+/Fc$ )

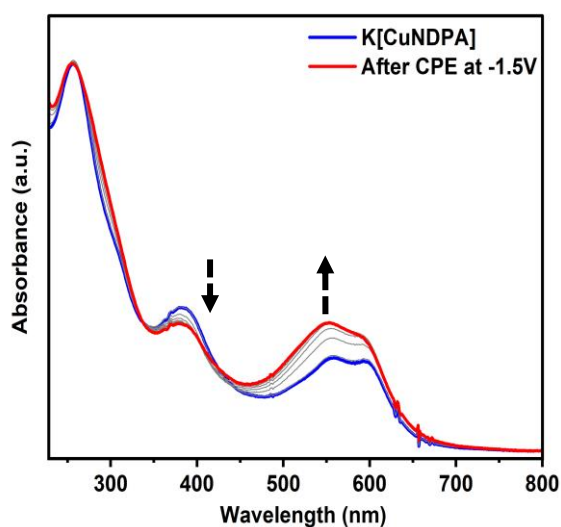

**Figure S32:** Absorption spectral change after CPE at -1.5V (Fc<sup>+</sup>/Fc)

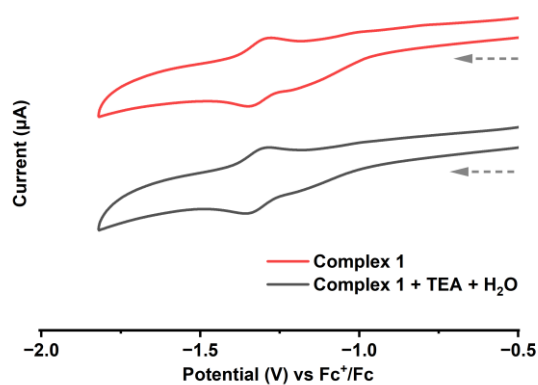

**Figure S33:** Cyclic voltammogram of 0.5 mM **1** in the presence of 70 mM Et<sub>3</sub>N and 5% water in Ar-saturated acetonitrile with 0.1 M TBAPF<sub>6</sub>. WE: GC, RE: Ag/AgCl, CE: Pt wire, Scan rate: 100 mV s<sup>-1</sup>

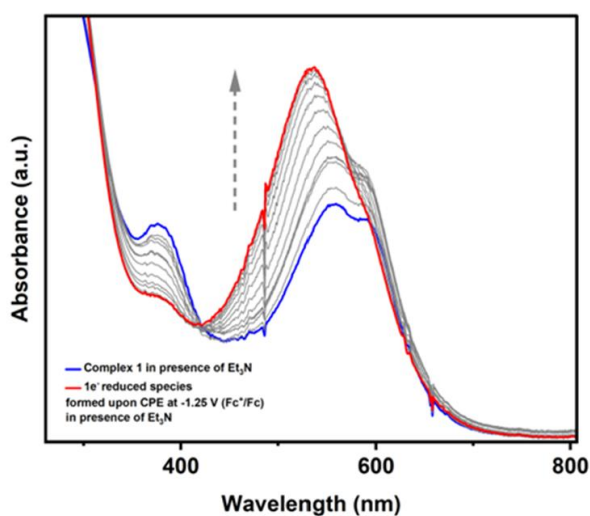

**Figure S34:** Absorption spectral change after CPE at -1.25V (Fc<sup>+</sup>/Fc) of Complex **1** in the presence of 70 mM Et<sub>3</sub>N and 5% water

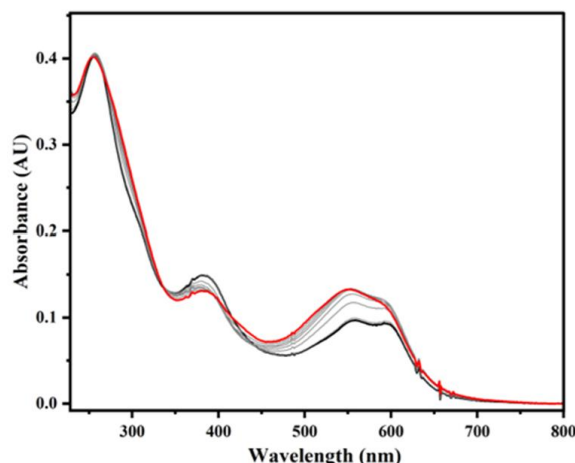

**Figure S35:** Absorption spectral change after CPE at -1.5V (Fc<sup>+</sup>/Fc) of Complex **1** in the presence of 70 mM Et<sub>3</sub>N and 5% water

#### Calculation on excited state potential:

It would be noteworthy to calculate the excited state redox potential from the electrochemical potential and  $E_{0-0}$ . Thus, the intersection of normalized absorption and emission spectra leads to excited energy of <sup>2</sup>LMCT state,  $E_{0-0} = 2.88 \text{ eV} = 23228.95 \text{ cm}^{-1}$ . (Isr. J. Chem. **1970**, 8 (2), 259-271) These results in the excited state redox potential of  ${}^1E_{ox}^* = -2.70 \text{ V vs Fc}^+/\text{Fc}$ ,  ${}^2E_{ox}^* = -2.31 \text{ V vs Fc}^+/\text{Fc}$ , and  ${}^1E_{red}^* = 1.76 \text{ V vs Fc}^+/\text{Fc}$ ,  ${}^2E_{red}^* = 1.50 \text{ V vs Fc}^+/\text{Fc}$ .

| Entry | 1    | [TEA] | [H <sub>2</sub> O] | Irradiation Time (h) | CO (μmol) | H <sub>2</sub> | TON <sub>CO</sub> | TOF <sub>CO</sub> <sup>max</sup> (h <sup>-1</sup> ) | TON <sub>H<sub>2</sub></sub> | Selectivity for CO (%) |
|-------|------|-------|--------------------|----------------------|-----------|----------------|-------------------|-----------------------------------------------------|------------------------------|------------------------|
|       | (μM) | (mM)  | (% v/v)            |                      |           | (μmol)         |                   |                                                     |                              |                        |
| 1     | 100  | 70    | 0                  | 2                    | 76.8      | 2.5            | 256               | 128                                                 | 8                            | 97 : 3                 |
| 2     | 100  | 70    | 0.5                | 2                    | 102.5     | 2.6            | 342               | 171                                                 | 8                            | 98 : 2                 |
| 3     | 100  | 70    | 1                  | 2                    | 129.3     | 2.2            | 431               | 216                                                 | 7                            | 98 : 2                 |
| 4     | 100  | 70    | 1.5                | 2                    | 170.9     | 2.9            | 570               | 285                                                 | 10                           | 98 : 2                 |
| 5     | 100  | 70    | 2                  | 2                    | 209.5     | 2.9            | 698               | 349                                                 | 10                           | 99 : 1                 |
| 6     | 100  | 70    | 3                  | 2                    | 237.3     | 3.2            | 791               | 395                                                 | 10                           | 99 : 1                 |
| 7     | 100  | 70    | 4                  | 2                    | 290.5     | 3.1            | 968               | 484                                                 | 10                           | 99 : 1                 |
| 8     | 100  | 70    | 5                  | 2                    | 339.7     | 2.2            | 1132              | 566                                                 | 7                            | 99 : 1                 |
| 9     | 100  | 70    | 10                 | 2                    | 229.7     | 2.9            | 766               | 383                                                 | 10                           | 99 : 1                 |

**Table S9:** Photocatalytic reduction of CO<sub>2</sub> to CO upon irradiation for 2 hrs of a CO<sub>2</sub>-saturated acetonitrile solution containing 100 μM of **1**, 70 mM Et<sub>3</sub>N and varying amounts of H<sub>2</sub>O (in % v/v) upon irradiation by 390 nm light

| Entry | 1 (μM) | [TEA] (mM) | [H <sub>2</sub> O] (%) | Irradiation Time (h) | CO (μmol) | H <sub>2</sub> (μmol) | TON <sub>CO</sub> | TOF <sub>CO</sub> <sup>max</sup> (h <sup>-1</sup> ) | TON <sub>H<sub>2</sub></sub> | Selectivity for CO (%) |
|-------|--------|------------|------------------------|----------------------|-----------|-----------------------|-------------------|-----------------------------------------------------|------------------------------|------------------------|
| 1     | 100    | 25         | 5                      | 2                    | 278.4     | 2.4                   | 921               | 461                                                 | 8                            | 99 : 1                 |
| 2     | 100    | 50         | 5                      | 2                    | 305.0     | 2.7                   | 1017              | 508                                                 | 9                            | 99 : 1                 |
| 3     | 100    | 70         | 5                      | 2                    | 339.7     | 2.2                   | 1132              | 566                                                 | 7                            | 99 : 1                 |
| 4     | 100    | 95         | 5                      | 2                    | 279.5     | 3.0                   | 932               | 466                                                 | 10                           | 99 : 1                 |
| 5     | 100    | 120        | 5                      | 2                    | 268.8     | 3.7                   | 896               | 448                                                 | 12                           | 99 : 1                 |

**Table S10:** Photocatalytic CO<sub>2</sub> reduction to CO upon irradiation for 2 hrs of a CO<sub>2</sub>-saturated acetonitrile solution containing 100 μM of **1**, varying amounts of Et<sub>3</sub>N and 5% H<sub>2</sub>O (v/v) in 390 nm light

| Light used                          | 1 ( $\mu\text{M}$ ) | [TEA] (mM) | [H <sub>2</sub> O] (%) | Irradiation Time (h) | CO ( $\mu\text{mol}$ ) | H <sub>2</sub> ( $\mu\text{mol}$ ) | TON <sub>CO</sub> | TOF <sub>CO</sub> <sup>max</sup> (h <sup>-1</sup> ) | TON <sub>H<sub>2</sub></sub> | Selectivity for CO (%) |
|-------------------------------------|---------------------|------------|------------------------|----------------------|------------------------|------------------------------------|-------------------|-----------------------------------------------------|------------------------------|------------------------|
| 390 nm                              | 100                 | 70         | 5                      | 2                    | 339.7                  | 2.2                                | 1132              | 566                                                 | 7                            | 99 : 1                 |
| Solar Simulator (Xe lamp) 400-750nm | 100                 | 70         | 5                      | 2                    | 278.6                  | 2.2                                | 929               | 465                                                 | 7                            | 99 : 1                 |
| 426 nm                              | 100                 | 70         | 5                      | 2                    | 144.6                  | 2.3                                | 482               | 241                                                 | 8                            | 98 : 2                 |
| Sunlight                            | 100                 | 70         | 5                      | 4                    | 275.9                  | 1.7                                | 920               | 230                                                 | 5                            | 99:1                   |

**Table S11:** Photocatalytic CO<sub>2</sub> reduction to CO upon irradiation of a CO<sub>2</sub>-saturated acetonitrile solution containing 100 $\mu\text{M}$  of **1** in different visible light sources.

| Control Condition | 1 ( $\mu\text{M}$ ) | [TEA] (mM) | [H <sub>2</sub> O] (%) | Irradiation Time (h) | CO ( $\mu\text{mol}$ ) |
|-------------------|---------------------|------------|------------------------|----------------------|------------------------|
| Dark              | 100                 | 25         | 5                      | 2                    | 0                      |
| Ar atmosphere     | 100                 | 50         | 5                      | 2                    | 0                      |

**Table S12:** Control reactions containing 100 $\mu\text{M}$  of **1** in different visible light sources.

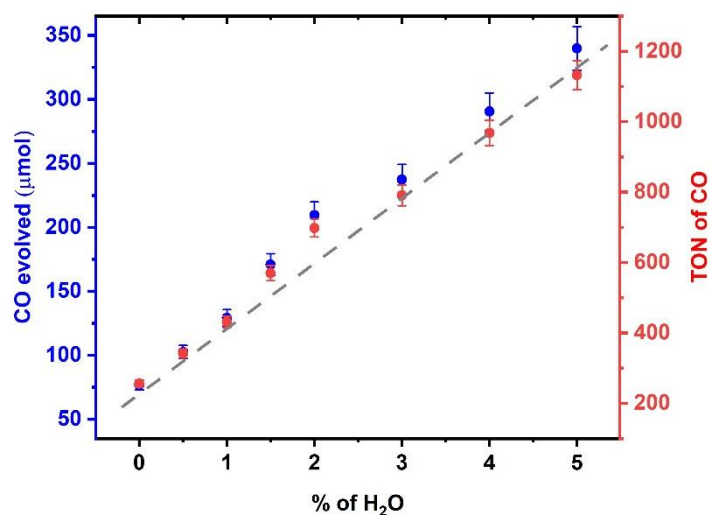

**Figure S36:** Photocatalytic CO<sub>2</sub> reduction [TON (red) and amounts (blue)] to CO irradiated for 2 hrs in CO<sub>2</sub>-saturated acetonitrile solution containing 100 $\mu\text{M}$  of **1**, 70 mM Et<sub>3</sub>N and varying amounts of H<sub>2</sub>O (in %v/v)

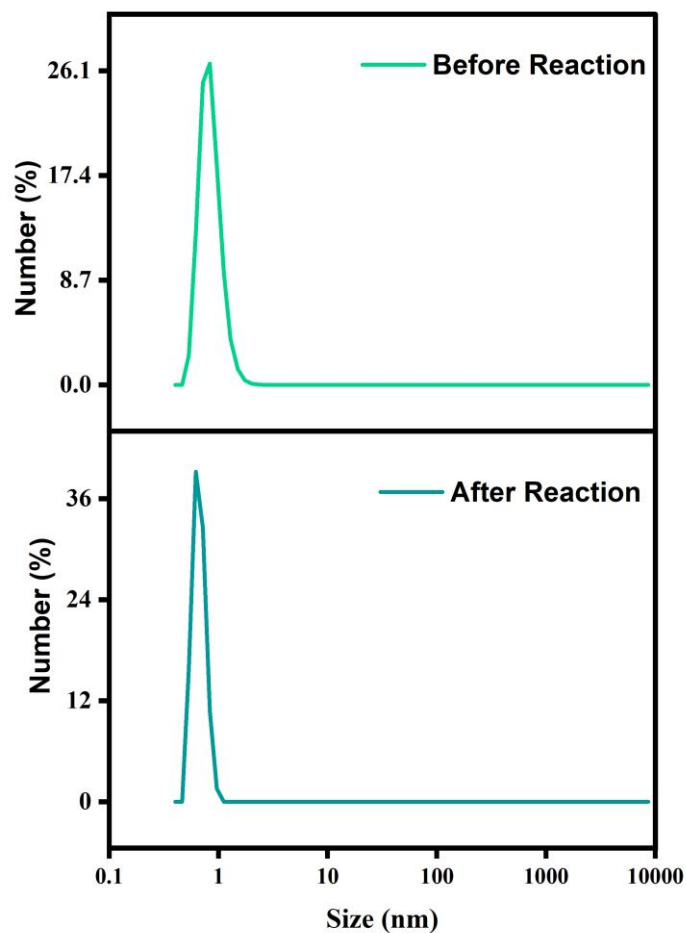

**Figure S37:** Particle size distribution of a CO<sub>2</sub>-saturated acetonitrile solution containing 0.1 mM **1**, 70 mM of TEA, and 1% H<sub>2</sub>O before and after irradiation in DLS

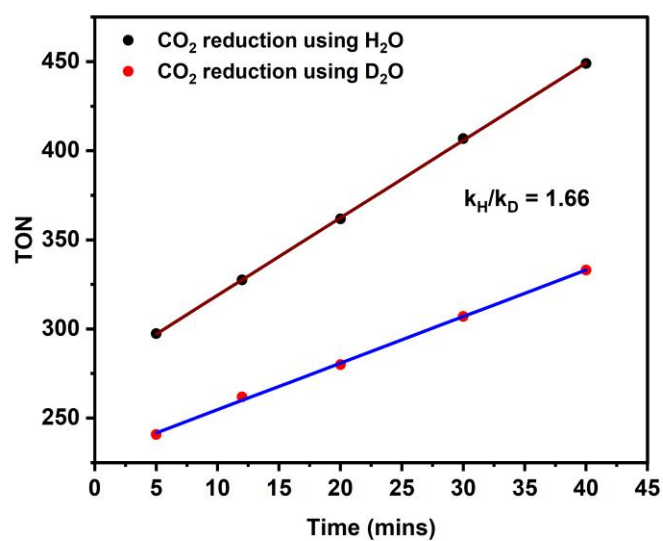

**Figure S38:** Plots of TON versus time determined in presence of H<sub>2</sub>O (Red line) and D<sub>2</sub>O (Blue line)



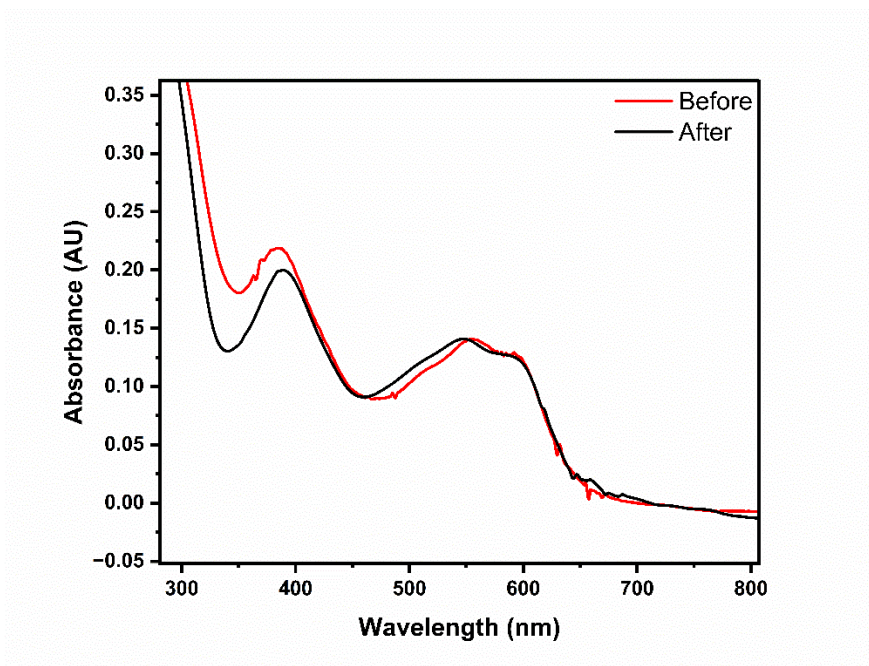

**Figure S39:** UV-vis absorption spectra of **1** in acetonitrile (Red line) and of the reaction mixture after photocatalysis for 2h in the presence of CO<sub>2</sub> (Black line)

**Photobleaching Control :**

Fluorescence intensity was measured after irradiation with 390nm (light used for photocatalysis) light for 10 min, and this measurement was repeated two times. No change in intensity was observed with the initial fluorescence peak. In the case of photobleaching, demetallation can increase the fluorescent intensity.

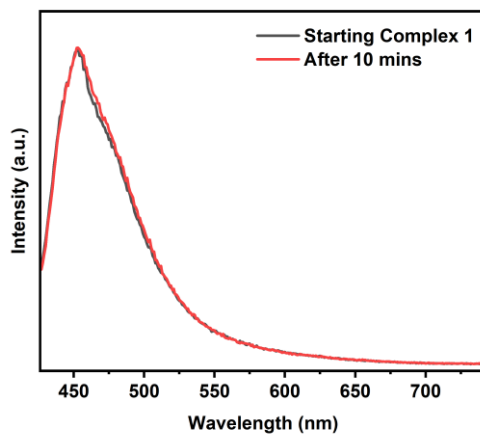

**Figure S40:** Emission spectra (ex. 400nm) of **1** before and after 10 min irradiation under 390nm light in acetonitrile

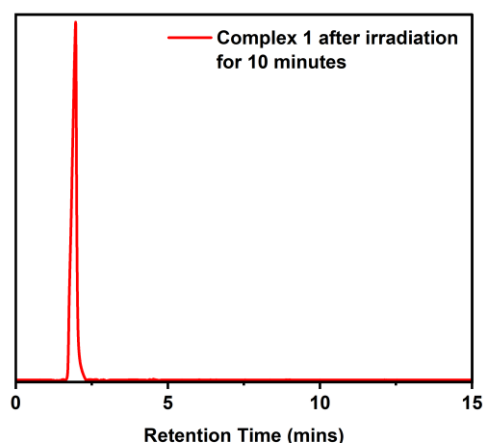

**Figure S41:** HPLC spectra of **1** after 10 min irradiation under 390nm light in acetonitrile

**Average Lifetime:**

Excited state lifetime for multi-exponent decays is always reported using the averaged lifetime ( $\tau_{avg}$ ) calculated as shown below:

$$\langle \tau_{avg} \rangle = \frac{\sum_i A_i \tau_i^2}{\sum_i A_i \tau_i}$$

where  $A_i$  stands for the corresponding amplitude of each component and  $\tau_i$  stands for the excited state lifetime of that component's decay curve.

| Complex          | $\tau_1$ (ns) | $\tau_2$ (ns) | $\tau_{avg}$ (ns) | $\chi^2$ |
|------------------|---------------|---------------|-------------------|----------|
| Complex <b>1</b> | 0.3 (18.99)   | 4.29(81.01)   | 4.22              | 1.15     |

**Table S13:** TCSPC lifetime fit parameters

According to our theoretical calculation we have observed a LMCT and ILCT mix state for ~370nm absorption band. It is possible that one of the components in the lifetime decay profile is coming from the LMCT excited state while the other is coming from the ligand-centered excited state.<sup>16</sup> (*Harrington & co-workers, Journal of the American Chemical Society 1975 97 (21), 6029-6036*)

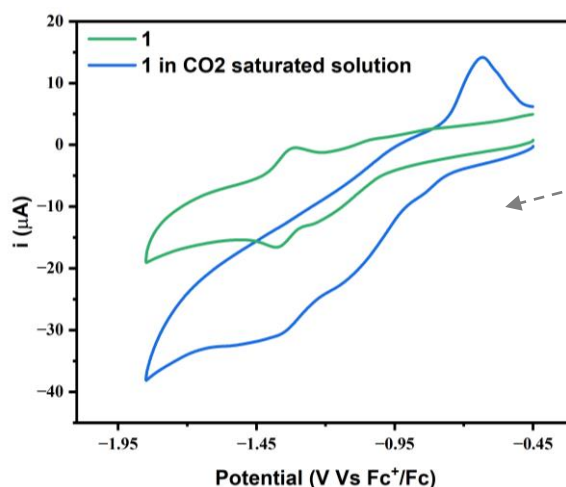

**Figure S42:** The CV of 0.5 mM **1** in acetonitrile and CO<sub>2</sub> saturated acetonitrile with 0.1 M TBAPF<sub>6</sub> WE: GC, RE: Ag/AgCl, CE: Pt wire, Scan rate: 100 mV s<sup>-1</sup>

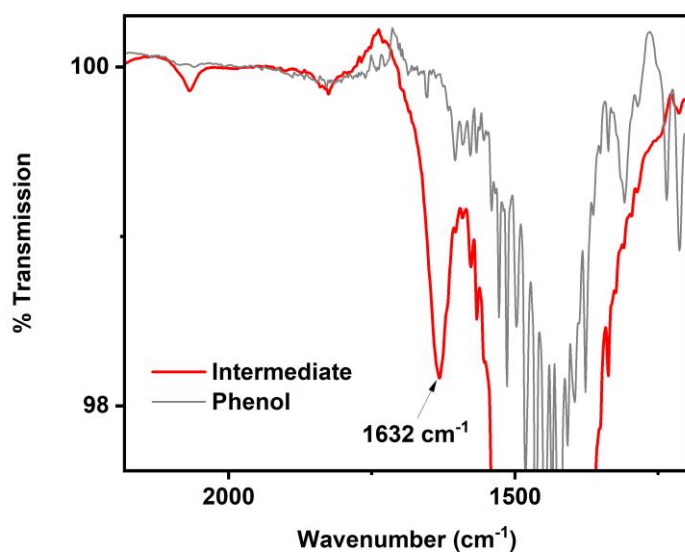

**Figure S43:** The infrared (IR) spectrum of a solution of complex **4** purged with CO<sub>2</sub> followed by the addition of p-methoxy-2,6-ditertbutylphenol (grey) at 90K to from the Cu(II)-COOH species (red) showed a peak at 1632 cm<sup>-1</sup>

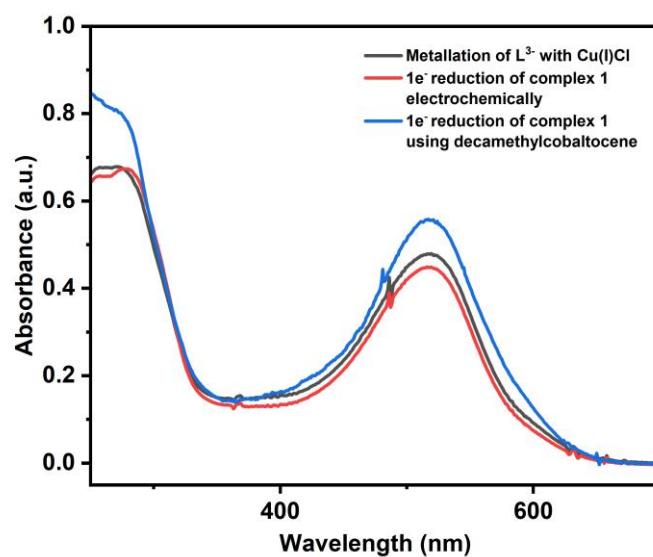

**Figure S44:** UV-vis absorption spectra of **4** prepared by (a) Metallation of L<sup>3-</sup> with Cu(I)Cl (Black line), (b) one electron reduction of **1** electrochemically by doing CPE at -1.25V (Red line), and (c) one electron reduction of **1** using decamethylcobaltocene (Blue line)

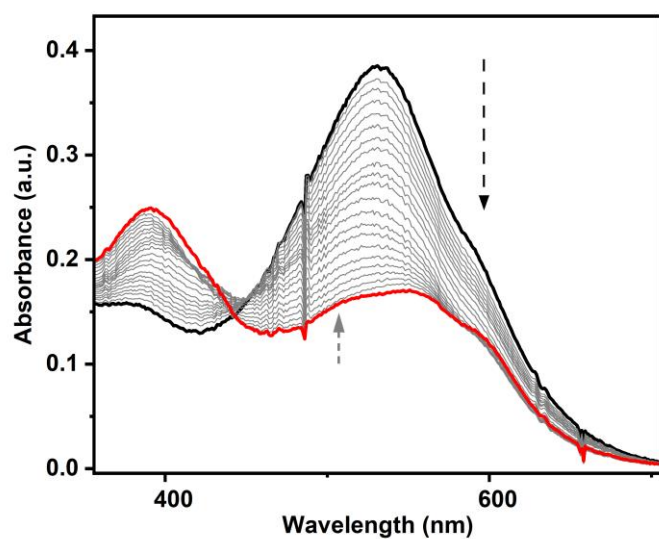

**Figure S45:** UV-vis absorption spectra showing the decay of species **4** (Black line) generated spectroelectrochemically by doing CPE at -1.25V (Fc<sup>+</sup>/Fc). A rise of a peak ~ 506 nm (Grey arrow) signifies the formation of **3** (Red line) upon decay of **4**, thus hinting that the single electron reduced species prefers an N<sub>3</sub>O coordination and returns to the corresponding N<sub>3</sub>O coordinated Cu(II) species (**3**) upon reoxidation in air.

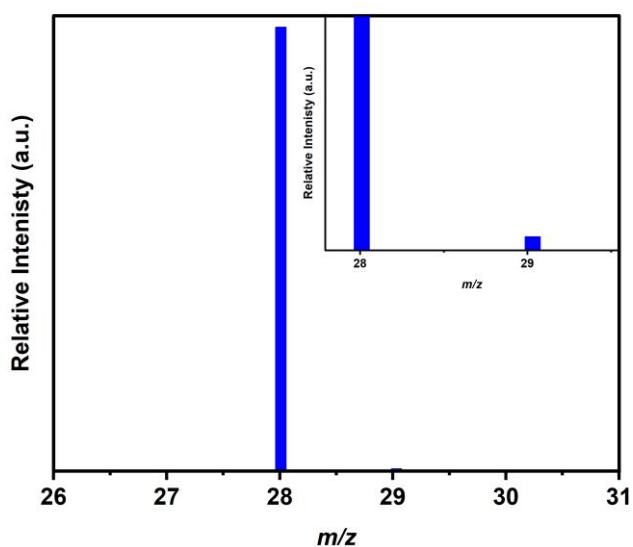

**Figure S46:** Mass spectra of CO ( $m/z$ : 28) detected using Gas Chromatography/ Mass Spectrometry (GC/MS) by headspace gas analysis of a CO<sub>2</sub> saturated 0.1 mM solution of **1** in ACN/H<sub>2</sub>O (5% v/v) in the presence of 70  $\mu$ M Et<sub>3</sub>N upon irradiation with a 390 nm light for 2 hrs.

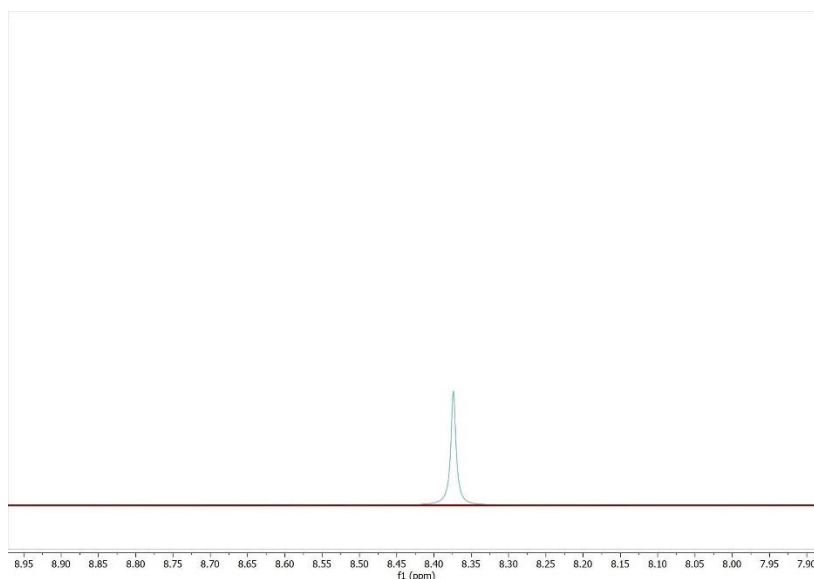

**Figure S47:** Solution phase product analysis with the  $^1\text{H}$ NMR spectroscopy. The green line shows a formate peak as a control, and the brown line shows  $^1\text{H}$ NMR of the reaction mixture extract.

| Sl. No. | Function-Integrated Photocatalyst        | Light (nm)         | TON <sub>CO</sub>          | Ref. No.  |
|---------|------------------------------------------|--------------------|----------------------------|-----------|
| 1       | Pyrene appended FeTPP                    | 400-700            | 1220 (400nm / 24 hrs)      | 11        |
| 2       | Fe <sub>2</sub> Na <sub>3</sub> purpurin | 450                | 2625 ± 334 (120 hrs)       | 12        |
| 3       | Fe-p-TMA                                 | $\lambda \geq 420$ | 101 (102 hrs)              | 13        |
| 4       | Cu(I)-BQXOT                              | 450                | 4.69 (4 hrs)               | 14        |
| 5       | Cu(II)purpurin                           | $\geq 400$         | 4.4 (1 hrs) (control exp.) | 15        |
| 6       | K[CuNDPA]                                | 390                | 1132 (2hrs)                | This Work |
|         |                                          | 400-750 (Xe lamp)  | 929 (2hrs)                 |           |
|         |                                          | 427                | 482 (2hrs)                 |           |
|         |                                          | Sunlight           | 920 (2hrs)                 |           |

**Table S14:** Function-integrated first-row transition metal containing photo-catalyst-based CO<sub>2</sub> reduction

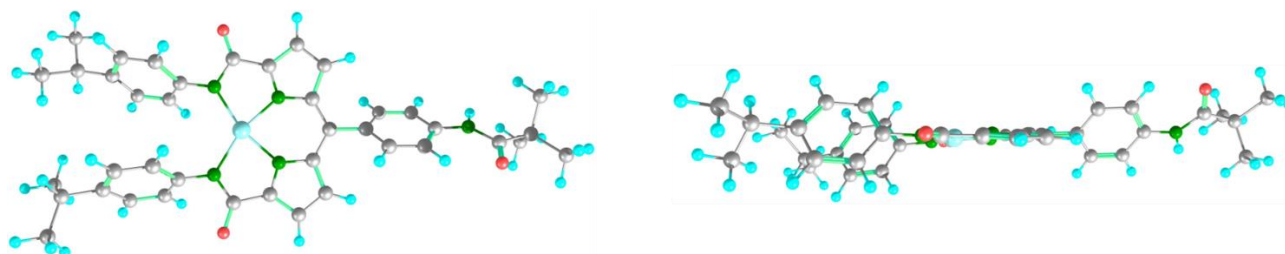

**Figure S48:** Optimized structure of the **1** in front side (left) and side-wise (right) view

| Bonds         | Crystal Bond Distances(Å) | DFT optimized Bond Distances(Å) |
|---------------|---------------------------|---------------------------------|
| C-N1(pyrrole) | 1.935                     | 1.991                           |
| C-N2(pyrrole) | 1.944                     | 1.990                           |
| C-N3(amide)   | 1.998                     | 2.088                           |
| C-N4(amide)   | 2.014                     | 2.082                           |

**Table S15:** Bond distance comparison of **1** from crystal structure and DFT optimized structure

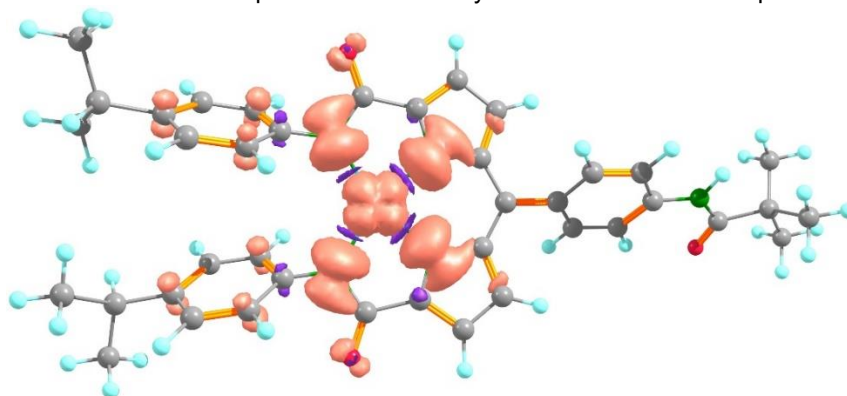

**Figure S49:** Spin density plot of complex **1** (isosurface value 0.003) derived from DFT calculation.

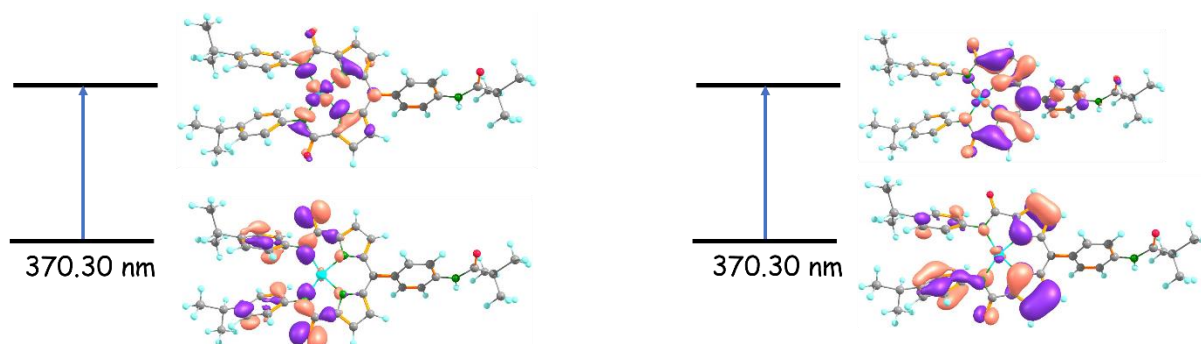

**Figure S50:** TD-DFT transition of **1** at 370.30 nm. Orbital plotted at 0.03 isosurface value.

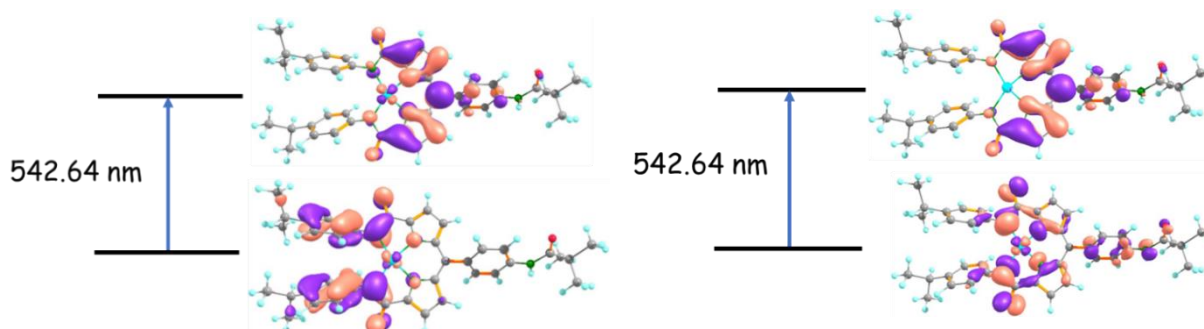

**Figure S51:** TD-DFT transition of **1** at 542.64 nm. Orbital plotted at 0.03 isosurface value.

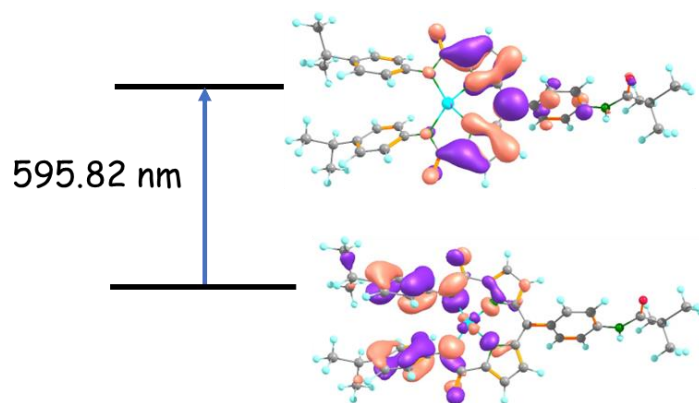

**Figure S52:** TD-DFT transition of **1** at 595.82 nm. Orbital plotted at 0.03 isosurface value.

### DFT Studies:

#### K[CuNDPA](1) optimized coordinate

Spin State- 1/2, Multiplicity- 2

|    |              |              |              |
|----|--------------|--------------|--------------|
| Cu | -0.921721000 | -0.033162000 | -0.036110000 |
| O  | -1.729512000 | -4.097200000 | 0.245555000  |
| O  | -1.570110000 | 4.055318000  | -0.320951000 |
| O  | 9.063666000  | 1.319669000  | 1.201196000  |
| N  | -2.058314000 | -1.787632000 | 0.032423000  |
| N  | 0.542404000  | -1.386530000 | -0.011597000 |
| N  | 0.597871000  | 1.258186000  | -0.099369000 |
| N  | -1.983654000 | 1.761078000  | -0.088827000 |
| N  | 8.355617000  | -0.294064000 | -0.255469000 |
| H  | 8.676366000  | -0.997687000 | -0.911380000 |
| C  | -1.314539000 | -2.916452000 | 0.171876000  |
| C  | 4.118254000  | -0.139281000 | -0.114088000 |
| C  | 1.921179000  | -1.325837000 | 0.049345000  |
| C  | 2.494442000  | 2.449473000  | -0.480932000 |
| H  | 3.536704000  | 2.697975000  | -0.634234000 |
| C  | 6.955944000  | -0.193810000 | -0.165986000 |
| C  | 1.414057000  | 3.322525000  | -0.541087000 |
| H  | 1.437319000  | 4.387005000  | -0.737847000 |
| C  | -3.379749000 | 1.962333000  | 0.032900000  |
| C  | 1.970335000  | 1.139952000  | -0.200589000 |
| C  | 6.200787000  | -1.011453000 | -1.030329000 |
| H  | 6.712377000  | -1.664398000 | -1.733990000 |
| C  | -5.506138000 | 2.819438000  | -0.805932000 |
| H  | -6.049480000 | 3.336917000  | -1.593893000 |
| C  | 0.152950000  | -2.644504000 | 0.192035000  |

|   |              |              |              |
|---|--------------|--------------|--------------|
| C | -1.200044000 | 2.859712000  | -0.251073000 |
| C | 4.811714000  | -0.991133000 | -0.997307000 |
| H | 4.257688000  | -1.622195000 | -1.685732000 |
| C | 0.254592000  | 2.529348000  | -0.304140000 |
| C | -4.060561000 | 1.502880000  | 1.171926000  |
| H | -3.501583000 | 0.989044000  | 1.950914000  |
| C | 2.635988000  | -0.107579000 | -0.086002000 |
| C | 6.276982000  | 0.654433000  | 0.727715000  |
| H | 6.835103000  | 1.283252000  | 1.407095000  |
| C | -4.134951000 | 2.611751000  | -0.963477000 |
| H | -3.636217000 | 2.965037000  | -1.861560000 |
| C | -5.436619000 | 1.710679000  | 1.320099000  |
| H | -5.932397000 | 1.348196000  | 2.219379000  |
| C | 2.398190000  | -2.657800000 | 0.306373000  |
| H | 3.433171000  | -2.950216000 | 0.428512000  |
| C | -6.188586000 | 2.381860000  | 0.343835000  |
| C | -3.464600000 | -1.936577000 | -0.042516000 |
| C | 1.284831000  | -3.486352000 | 0.390972000  |
| C | 9.331375000  | 0.425352000  | 0.395819000  |
| C | 4.881872000  | 0.679108000  | 0.737575000  |
| H | 4.379094000  | 1.330964000  | 1.446062000  |
| C | -4.209001000 | -2.545966000 | 0.986690000  |
| H | -3.693415000 | -2.905735000 | 1.872736000  |
| C | -6.294754000 | -2.261119000 | -0.256937000 |
| C | -5.590778000 | -2.707937000 | 0.876256000  |
| H | -6.125616000 | -3.196666000 | 1.688021000  |
| C | 10.784715000 | 0.020065000  | 0.050367000  |
| C | -5.552495000 | -1.627721000 | -1.265327000 |
| H | -6.064648000 | -1.258898000 | -2.152792000 |
| C | -4.165853000 | -1.466112000 | -1.164284000 |
| H | -3.615238000 | -0.981372000 | -1.967554000 |
| C | -7.673930000 | 2.654301000  | 0.552751000  |
| C | -7.794250000 | -2.486351000 | -0.414896000 |
| H | -8.113381000 | -1.909746000 | -1.293790000 |
| C | 11.036535000 | 0.162700000  | -1.469276000 |
| H | 10.436956000 | -0.535796000 | -2.065033000 |
| H | 12.091541000 | -0.047993000 | -1.682728000 |
| H | 10.817975000 | 1.181025000  | -1.813781000 |
| C | -8.109529000 | -3.969738000 | -0.697889000 |
| H | -7.573769000 | -4.329240000 | -1.585306000 |
| H | -7.819336000 | -4.602633000 | 0.151018000  |
| H | -7.984524000 | 2.074510000  | 1.432599000  |
| H | 1.269473000  | -4.552459000 | 0.579546000  |
| C | 11.751395000 | 0.944911000  | 0.808166000  |
| H | 11.614219000 | 0.869693000  | 1.892079000  |
| H | 12.783461000 | 0.659304000  | 0.572492000  |
| H | 11.613005000 | 1.993328000  | 0.521855000  |



|   |              |              |              |
|---|--------------|--------------|--------------|
| C | 11.029777000 | -1.442012000 | 0.493365000  |
| H | 10.833306000 | -1.568599000 | 1.565232000  |
| H | 10.403998000 | -2.156005000 | -0.054615000 |
| H | 12.077530000 | -1.708152000 | 0.307109000  |
| C | -8.608282000 | -1.984851000 | 0.792014000  |
| H | -8.408452000 | -0.926738000 | 0.999168000  |
| H | -9.683163000 | -2.095037000 | 0.598333000  |
| H | -8.375474000 | -2.556291000 | 1.699461000  |
| C | -8.541574000 | 2.199247000  | -0.635075000 |
| H | -9.605636000 | 2.341403000  | -0.405777000 |
| H | -8.318332000 | 2.777375000  | -1.540694000 |
| H | -8.383493000 | 1.138649000  | -0.864455000 |
| C | -7.930414000 | 4.142528000  | 0.867905000  |
| H | -8.994618000 | 4.315528000  | 1.076064000  |
| H | -7.356066000 | 4.469620000  | 1.743639000  |
| H | -7.645137000 | 4.779134000  | 0.020104000  |
| H | -9.184819000 | -4.110058000 | -0.870668000 |

## References:

- 1 W. L. F. Armarego, *Purification of Laboratory Chemicals*, 2017, 95–634.
- 2 M. J. Frisch, G. W. Trucks, H. B. Schlegel, G. E. Scuseria, M. A. Robb, J. R. Cheeseman, G. Scalmani, V. Barone, G. A. Petersson and H. Nakatsuji, *Wallingford, CT*.
- 3 A. D. Becke, *The Journal of Chemical Physics*, 1993, **98**, 5648–5652.
- 4 C. Lee, W. Yang and R. G. Parr, *Phys. Rev. B*, 1988, **37**, 785–789.
- 5 P. J. Stephens, F. J. Devlin, C. F. Chabalowski and M. J. Frisch, *J. Phys. Chem.*, 1994, **98**, 11623–11627.
- 6 S. H. Vosko, L. Wilk and M. Nusair, *Can. J. Phys.*, 1980, **58**, 1200–1211.
- 7 G. M. Sheldrick, *Acta Cryst A*, 2015, **71**, 3–8.
- 8 A. L. Spek, *J Appl Cryst*, 2003, **36**, 7–13.
- 9 L. J. Bourhis, O. V. Dolomanov, R. J. Gildea, J. a. K. Howard and H. Puschmann, *J Appl Cryst*, 2009, **42**, 339–341.
- 10 C. F. Macrae, I. Sovago, S. J. Cottrell, P. T. A. Galek, P. McCabe, E. Pidcock, M. Platings, G. P. Shields, J. S. Stevens, M. Towler and P. A. Wood, *J Appl Cryst*, 2020, **53**, 226–235.
- 11 R. J. Watts, M. J. Brown, B. G. Griffith and J. S. Harrington, *J. Am. Chem. Soc.*, 1975, **97**, 6029–6036.
- 11 K. Kosugi, C. Akatsuka, H. Iwami, M. Kondo, S. Masaoka, *J. Am. Chem. Soc.* **2023**, *145*, 10451–10457.
- 12 H. Yuan, J. Du, M. Ming, Y. Chen, L. Jiang, Z. Han, *J. Am. Chem. Soc.* **2022**, *144*, 4305–4309.
- 13 H. Rao, J. Bonin, M. Robert, *Chem. Commun.* **2017**, *53*, 2830–2833.
- 14 C. Bruschi, X. Gui, P. Rauthe, O. Fuhr, A. Unterreiner, W. Klopffer, C. Bizzarri, *Chemistry A European J* **2024**, *30*, e202400765.
- 15 H. Yuan, B. Cheng, J. Lei, L. Jiang, Z. Han, *Nat Commun* **2021**, *12*, 1835.
- 16 R. J. Watts, M. J. Brown, B. G. Griffith and J. S. Harrington, *J. Am. Chem. Soc.*, 1975, **97**, 6029–6036.
